# 1 **Functional connectivity with short-term dynamics explains diverse** 2 **patterns of excitatory spike transmission *in vivo***

3 Abed Ghanbari<sup>1</sup>, Naixin Ren<sup>2</sup>, Christian Keine<sup>3</sup>, Carl Stoelzel<sup>2</sup>, Bernhard Englitz<sup>4</sup>, Harvey A.  
4 Swadlow<sup>2</sup>, and Ian H. Stevenson<sup>1,2</sup>

5 <sup>1</sup> *University of Connecticut, Department of Biomedical Engineering*

6 <sup>2</sup> *University of Connecticut, Department of Psychological Sciences*

7 <sup>3</sup> *Carver College of Medicine, Iowa Neuroscience Institute, Department of Anatomy and Cell Biology,*  
8 *University of Iowa*

9 <sup>4</sup> *Radboud University, Donders Institute for Brain, Cognition and Behavior, Department of*  
10 *Neurophysiology*

11

## 12 **Abstract**

13 Fast information transmission in neural networks is heavily influenced by short-term synaptic  
14 plasticity (STP), and the type and timescale of STP varies by cell-type and brain region. Although  
15 STP has been widely characterized *in vitro* from recordings of postsynaptic potentials or currents,  
16 characterizing STP in *in vivo* in behaving animals is difficult due to the lack of large-scale  
17 intracellular recordings. Here, we use paired extracellular observations to estimate the short-term  
18 dynamics of synaptic transmission from spikes alone. We introduce an augmented generalized  
19 linear model (GLM) that includes a dynamic functional connection as well as several, non-synaptic  
20 factors that alter spike transmission probability. Our model captures the diverse short-term  
21 dynamics of *in vivo* spike transmission at identified synapses and accurately captures the effects  
22 of local pre- and postsynaptic spike patterns. We applied this model to large-scale multi-electrode  
23 recordings to describe stimulus-dependent shifts in spike transmission and cell-type specific  
24 differences in STP.

## 25 **Introduction**

26 Neural information processing is largely governed by synapses and their dynamics [1,2]. Short-  
27 term synaptic plasticity (STP) alters synaptic transmission on timescales from a few milliseconds  
28 to several seconds depending on the sequence of presynaptic spiking. Presynaptic STP arises from  
29 a mixture of two main processes: depletion of neurotransmitter-containing vesicles, which causes  
30 depression, and the elevation of residual  $\text{Ca}^{2+}$  in the presynaptic terminal, which causes facilitation  
31 by increasing vesicle release probability [3]. This can be observed in intracellular recordings  
32 where, following repetitive stimulation of the presynaptic terminal, the amplitudes of postsynaptic  
33 potentials (PSPs) or currents (PSCs) will either decrease (depression) or increase (facilitation)  
34 [3,4]. The degree of STP differs depending on the pre- and postsynaptic cell type [5] and brain  
35 region [6,7]. Functionally, STP can act as a temporal filter [8], can allow neural circuits to  
36 specialize for specific tasks [9,10], and may also underlie gain control [11], network stability [12],  
37 and long-term synaptic plasticity [13]. Here we focus on understanding how STP-induced changes

38 in PSP/PSC amplitudes shape postsynaptic spiking. *In vivo* studies have shown that postsynaptic  
39 spiking probability, similar to the amplitude of PSP/PSCs, depends on the recent history of  
40 presynaptic spiking [14,15]. Just as PSP/PSCs show diverse patterns of depression and facilitation,  
41 the postsynaptic spiking probability also appears to have complex patterns depending on the brain  
42 region and cell-types [16]. However, postsynaptic spiking probability is modified by many  
43 additional variables besides STP at a single synaptic input. Here we aim to understand how the  
44 pattern of presynaptic spiking activity and short-term synaptic plasticity shape postsynaptic  
45 spiking probability.

46 To do so, we use simultaneously recorded pre- and postsynaptic spiking activity to detect and study  
47 putative monosynaptic connections. When an excitatory, monosynaptic connection is present,  
48 cross-correlations between the spiking of a pre- and postsynaptic neuron often show a rapid,  
49 transient increase in postsynaptic spikes following the presynaptic spike. This occurs at an interval  
50 reflecting the presynaptic axonal conduction time plus the synaptic delay (usually  $< 4$  ms) [17,18].  
51 However, this cross-correlation is not static. Previous studies have found that the cross-correlation  
52 often differs for presynaptic spikes that are part of a burst compared to isolated spikes [14]. Spike  
53 transmission probability appears to depend on the timing of previous presynaptic spikes, and one  
54 factor influencing spike probability may be STP [19,20]. For example, depressing synapses would  
55 have more reliable synaptic transmission in response to isolated presynaptic spikes following long  
56 inter-spike intervals (ISIs) compared to shorter intervals (in bursts) [14,16]. On the other hand,  
57 facilitating synapses would show a stronger response to presynaptic spikes following shorter ISIs  
58 (bursts) compared to the presynaptic spikes following longer ISIs (isolated) [21]. By looking at  
59 the corresponding cross-correlograms from a subset of presynaptic spikes with specific ISIs,  
60 previous studies have found highly diverse, non-monotonic spike transmission patterns for  
61 different synapses [16]. This diversity in patterns of spike transmission probability, however, is  
62 not solely attributable to STP. When two presynaptic spikes occur in close succession, the  
63 membrane time-constant may cause postsynaptic potentials (PSP) to sum and increase the spike  
64 probability even if the individual PSPs were sub-threshold [22]. Moreover, the history of  
65 postsynaptic spiking also affects spike probability such that even if the PSP is strong, it may not  
66 trigger a spike if it falls within the refractory period or during an after-hyperpolarization ( $I_{AHP}$ )  
67 current [23]. Finally, slow fluctuations in the overall excitability of the postsynaptic neuron, due  
68 to neuro-modulation, for instance, could also change synaptic transmission probability [24]. In  
69 different synapses the degree that each factor contributes varies and leads to diverse patterns of  
70 postsynaptic spike transmission probability.

71 The overall correlation structure in spiking data can often be estimated by generalized linear  
72 models (GLMs) [25,26]. However, previous models have treated these interactions as static, and,  
73 thus, cannot capture dynamic changes in spike transmission probability. Here we extend these  
74 GLMs to describe dynamic interactions between neurons and account for the diversity of spike  
75 transmission patterns [26–28]. For each individual presynaptic spike, our model aims to predict  
76 postsynaptic spikes accounting for the postsynaptic neuron's baseline firing rate, slow fluctuations

77 of the postsynaptic firing rate, the effect of postsynaptic spiking history, and a coupling term  
78 affected by synaptic summation and short-term synaptic plasticity. The conditional intensity of our  
79 model provides estimates of postsynaptic spiking probability following every single presynaptic  
80 event based on the previously observed sequence of pre- and postsynaptic spiking. The split cross-  
81 correlogram only describes the average response conditioned on the ISI preceding the most recent  
82 presynaptic spike. By using a model-based approach we can incorporate the full sequence of  
83 presynaptic spikes beyond the most recent one, explicitly account for factors such as postsynaptic  
84 history, and link the observed patterns of spike transmission to the underlying dynamics of vesicle  
85 depletion and release probability.

86 To evaluate the model, we first examined its ability to capture the observed patterns of spike  
87 transmission probability for three well-studied, strong putative synapses using pre- and  
88 postsynaptic spike observations from: 1) a pair of neurons in the mouse thalamus, 2) an auditory  
89 nerve projection onto a spherical bushy cell (ANF-SBC) in the gerbil, and 3) a neuron in  
90 ventrobasal (VB) thalamus of the rabbit projecting to a putative fast-spike inhibitory neuron in  
91 primary somatosensory (S1) barrel cortex (VB – Barrel). Short-term synaptic dynamics of this  
92 latter system have been extensively characterized *in vivo* [14,29,30]. Similarly, ANF-SBC  
93 synapses have been extensively studied in previous experiments and are well-characterized *in vitro*  
94 [31–33]. Using the auditory brainstem connection, we explore how synaptic transmission  
95 probability changes depending on the stimulus. Our result suggests that a simplified model,  
96 without considering short-term plasticity, is insufficient to explain how patterns of spike  
97 transmission change as the pattern of presynaptic input changes. Finally, we apply our model to  
98 spiking data from a large-scale, multi-electrode array recorded from multiple areas in an awake  
99 mouse. Here we investigate the STP dynamics in putative synapses from excitatory neurons onto  
100 two putative inhibitory subtypes (e.g. FS: fast-spiking, RS: regular-spiking). We find that these  
101 two types of connections have distinct patterns of spike transmission, where excitatory-FS  
102 connections appear to be slightly more depressing than excitatory-RS connections. Together, these  
103 results illustrate the diversity of spike transmission patterns *in vivo* and present one potential  
104 approach to studying short-term synaptic dynamics in behaving animals.

105 Most previous approaches to describing interactions between neurons using spiking activity have  
106 focused on static functional connectivity. These models improve both encoding and decoding  
107 accuracy and have been shown to capture physiological network structure in some cases [34]. Here  
108 we model dynamic functional connectivity where the effect of each presynaptic spike on the  
109 probability of postsynaptic spiking depends on the previously observed sequence of presynaptic  
110 spiking. This augmented GLM can be directly compared with the observed spike transmission  
111 probability and also allows us to disentangle the contributions of short-term synaptic plasticity,  
112 synaptic summation, presynaptic firing rate fluctuations, and spike history. Moreover, we find that  
113 modeling dynamic functional connections allows us to better predict postsynaptic responses  
114 compared to the static models. Since modeling static functional connectivity can improve decoding  
115 [25,26,35], modeling dynamic functional connectivity may improve decoding further as well. As

116 multi-electrode arrays improve, and the number of simultaneously recorded neurons increases,  
117 models of dynamic functional connectivity may provide insight into not just network structure, but  
118 also the extent of depression or facilitation in these networks, as well as differences in network  
119 dynamics across multiple brain areas and under different behavioral conditions. Here, our findings  
120 suggest that, at least in some cases, *in vivo* spike transmission dynamics differ substantially for  
121 different stimuli and different cell-types.

## 122 **Results**

123 Short-term synaptic plasticity directly affects synaptic information processing by altering the  
124 amplitude of presynaptic currents [2], but in most neural systems it remains unclear how these  
125 presynaptic effects translate to altered postsynaptic spike probability. Postsynaptic spiking is  
126 affected by many factors including short-term plasticity, postsynaptic spike history, summation of  
127 PSPs, and slow fluctuations in presynaptic firing rate. Here we developed a statistical model that  
128 includes each of these factors and allows their effects to be estimated solely using pre- and  
129 postsynaptic spiking activity. In this approach, working with spikes rather than PSC/PSPs enables  
130 us to understand the short-term changes in synaptic transmission probability *in vivo* where large-  
131 scale intracellular recordings have not been achieved.

### 132 **Spike transmission probability varies strongly as a function of presynaptic ISIs**

133 Here we define spike transmission probability as the probability of postsynaptic spiking in a  
134 window shortly after each presynaptic spike. One conventional approach to study spike  
135 transmission and changes in transmission probability are cross-correlograms. Cross-correlograms  
136 of excitatory monosynaptic connections show a rapid, transient increase in the postsynaptic spiking  
137 probability shortly (usually  $< 4\text{ms}$ , although this depends on the presynaptic axonal conduction  
138 delay) after the presynaptic spike [17]. The timing and shape of the cross-correlogram depends on  
139 the synaptic delay, the strength of the connection and varies between synapses. However, in the  
140 overall cross-correlogram since all presynaptic ISIs are averaged, the dependence of spike  
141 transmission probability on the presynaptic ISIs remains hidden (Fig. 1A). To determine the effect  
142 of presynaptic ISI on spike transmission probability we can calculate the cross-correlogram for a  
143 subset of presynaptic spikes with a specific ISI. and previous studies showed that transmission  
144 probabilities can vary for different ISIs within the same synapse [14,16]. Moreover, the short-term  
145 dynamics of spike transmission probability can differ for different synapses as a function of  
146 presynaptic ISIs. To illustrate this diversity, we examined three strong synapses from three distinct  
147 neural systems: (i) a pair of neurons in thalamus in a mouse, (ii) a projection from ventrobasal to  
148 somatosensory barrel cortex (VB-Barrel) in a rabbit, and (iii) the auditory nerve fiber to spherical  
149 bushy cell projection in a gerbil (ANF-SBC). Although the presynaptic neurons have diverse ISI  
150 distributions (Fig. 1B), splitting the spikes into ISI quantiles and calculating the correlogram for  
151 each quantile, demonstrates how postsynaptic responses differ following short and long  
152 presynaptic ISIs. For the pair of neurons in thalamus, spike transmission has a higher probability  
153 at short and long intervals and a lower probability for mid-range ISIs. For VB-Barrel transmission

154 probability is higher for longer ISIs, while for ANF-SBC the highest transmission probability  
155 occurs at intermediate intervals (Fig. 1C).

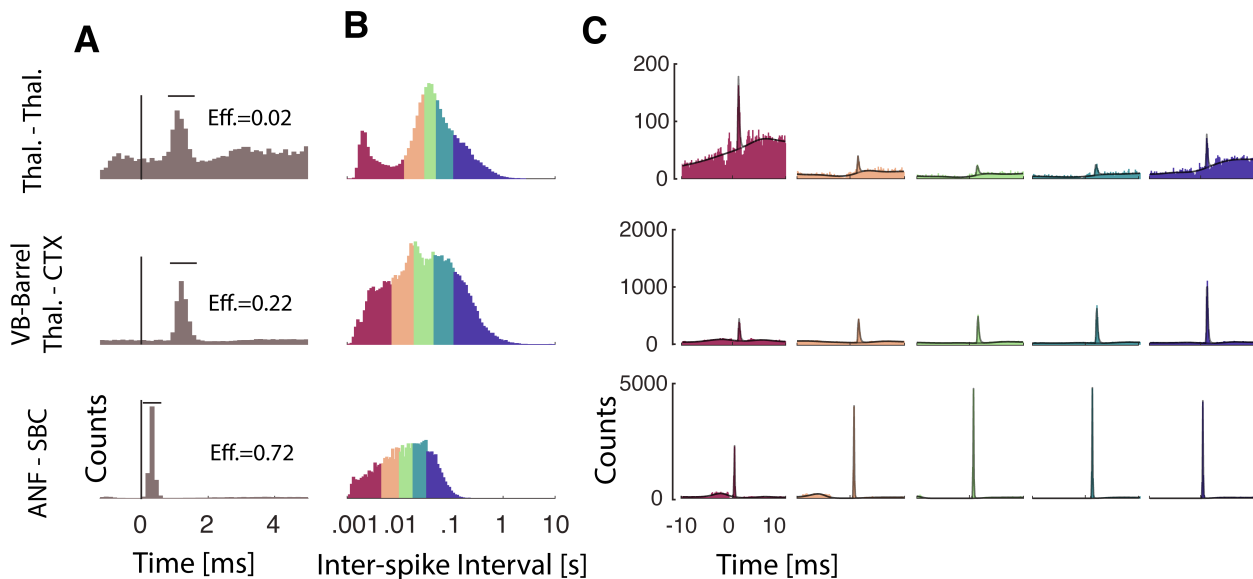

156

157 **Fig. 1: Spike transmission probability depends on the presynaptic ISI and differs between synapses.**  
158 **A)** Cross-correlograms between pre- and postsynaptic spiking show an increase in the postsynaptic spike  
159 count (or probability) after a short latency, indicative of a monosynaptic connection. Efficacy (Eff.) for  
160 each synapse denotes the ratio between numbers of postsynaptic spikes in the synaptic peak (horizontal  
161 bars) corrected for the baseline number of expected postsynaptic spikes to number of presynaptic spikes.  
162 **B)** Inter-spike interval distributions (log-scale) for the presynaptic neuron for three different synapses. The  
163 distributions are color-coded into 5 quantiles with equal number of presynaptic spikes. **C)** For each ISI  
164 quantile, we calculate a separate cross-correlogram. Colors correspond to (B) going from shorter  
165 presynaptic ISIs (left) to longer ISIs (right). Note that both the baseline firing rate and the synaptic peak for  
166 each connection change as a function of presynaptic ISI. Solid lines overlaying the cross-correlograms  
167 illustrate model fits used to estimate the synaptic effect and the smooth baseline.

## 168 The shape of spike transmission patterns depends on multiple factors

169 In synapses exhibiting short-term synaptic plasticity the postsynaptic response after each  
170 presynaptic spike changes according to the recent history of presynaptic spiking [28,36]. However,  
171 besides synaptic dynamics there are additional factors that alter spike timing. At short presynaptic  
172 ISIs, membrane potential summation can lead to larger PSPs and increased spike probability, even  
173 in absence of short-term synaptic plasticity [22]. The spiking nonlinearity and the history of  
174 postsynaptic spiking can also alter how a given pattern of presynaptic input is transformed into  
175 postsynaptic spiking [26,37].

176 To illustrate how STP, synaptic summation, and postsynaptic history interact to create the observed  
177 spike transmission pattern we simulated from a simplified rate model with linear voltage  
178 summation, short-term plasticity, a soft spiking nonlinearity, and an after-hyperpolarization (Fig.

179 2). Similar to experimental data, the spike transmission probability in this simplified model  
180 depends on the presynaptic ISI as well as the type of STP. For depressing synapses, the spike  
181 transmission probability increases for longer presynaptic ISIs while for facilitating synapses it  
182 increases for mid-range ISIs [28,36]. Independent of STP type, PSPs sum at short ISIs (Fig. 2A).  
183 However, the exact shape of transmission probabilities also depends on the strength of the synapse  
184 and, possibly, the history of postsynaptic spiking. An after-hyperpolarization current following  
185 each postsynaptic spike, for instance, can briefly decrease the probability of subsequent spikes.  
186 In our simulation, we find that “spike interference” from previous postsynaptic activity can  
187 counteract membrane potential summation (Fig. 2B). This type of postsynaptic spike interference  
188 generally decreases the spike probability for shorter presynaptic ISIs, but the magnitude of this  
189 decrease depends on the synaptic strength and type of STP (Fig. 2C). These simulations illustrate  
190 how the pattern of spike transmission probability results from the complex interaction between the  
191 membrane potential, the spike nonlinearity, the post-spike history, and short-term synaptic  
192 plasticity.

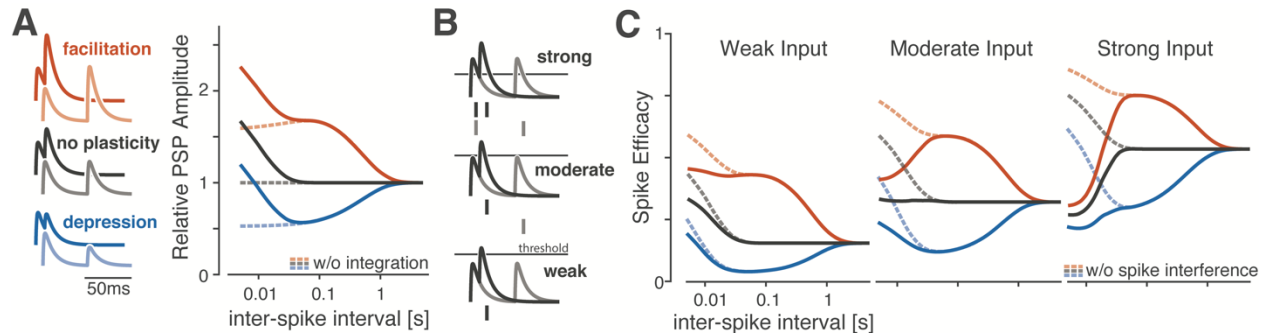

193

194 **Fig. 2: A simulation of a simplified rate model shows how spike transmission probability**  
195 **depends on multiple factors.** **A:** For different types of short-term synaptic plasticity, postsynaptic  
196 summation increases the amplitudes of the postsynaptic potentials (PSP) at shorter ISIs. Lines  
197 denote the membrane potential of a postsynaptic neuron in a simplified model as it responds to  
198 short (dark traces) and long (light) paired presynaptic pulses. Relative amplitudes of excitatory  
199 postsynaptic potentials increase under the simplified model depending on the type of STP (right  
200 right panel). **B:** Spike generation changes with synaptic strength. In this paired-pulse stimulation  
201 paradigm, stronger synapses are more likely to generate a spike following the first presynaptic  
202 impulse which can then decrease the spiking probability following the second impulse if there are  
203 post-spike history effects. As in (B) traces denote postsynaptic membrane potential responses to  
204 short (dark) and long (light) presynaptic ISIs. Dashes denote example postsynaptic spiking, with  
205 “spike interference” occurring for strong synapses and short ISIs. **C:** The pattern of spike  
206 transmission probability under the simplified model changes depending on the type of STP, the  
207 coupling strength, and presence of post-spike interference. Dashed lines show transmission  
208 probability without interference from previous postsynaptic spikes, while solid lines show how  
209 post-spike history effects can decrease the spike transmission probability.

## 210 **Spike transmission patterns are diverse across regions and species**

211 The combination of these factors could be one explanation for to the diversity of spike transmission  
212 patterns in experimental data. To account for STP, postsynaptic history effects, and slow changes  
213 of firing rate we extend a previously developed GLM framework for static functional connections  
214 [26] to include short-term dynamics. In the previous, static GLM the probability of postsynaptic  
215 spiking is modeled as a linear combination of a baseline firing rate parameter, a post-spike history  
216 filter to capture the postsynaptic spike dynamics, such as refractoriness and burstiness, and a  
217 coupling filter describing the fixed influence of presynaptic spikes. The sum of these effects is  
218 then passed through a spiking non-linearity [26]. In our extended model we added a linear term  
219 that allows changes in excitability of the postsynaptic neuron as a function of the presynaptic firing  
220 rate (timescale  $>1$ min) and allow the coupling term to change for each presynaptic spike according  
221 to the Tsodyks and Markram (TM) model of STP [36]. We fit the parameters of this TM-GLM  
222 using only the pre- and postsynaptic spike observations and obtain parameters for each effect using  
223 approximate maximum likelihood estimation (see Methods). This provides estimates of the history  
224 and coupling filters, as in a static GLM, as well as additional parameters for the dynamical synapse  
225 (TM model) including facilitation, depression, membrane time constants, and release probability.  
226 Given these parameters, the model estimates the postsynaptic spiking probabilities following each  
227 observed presynaptic spike and predicts spike transmission probabilities in response to arbitrary  
228 patterns of presynaptic inputs.

229 After fitting the model to real pre- and postsynaptic spike-trains, we compared its behavior to  
230 experimentally observed patterns of spike transmission probability. In particular, we compare  
231 peaks in the split cross-correlograms to the average model prediction for the same sets of  
232 presynaptic spikes (see Methods). We find that our model is flexible enough to explain the changes  
233 in synaptic transmission probability observed in spiking statistics for all three synapses above  
234 (Fig. 3A). Moreover, using the model-based approach, the contributions of each model component  
235 can be disentangled. Our results suggest that the pattern of spike transmission probability for the  
236 thalamus connection is dominated by a combination of membrane potential summation and short-  
237 term depression. Although depression decreases spike transmission probability at shorter ISIs,  
238 membrane summation acts to increase postsynaptic spiking. The ANF-SBC synapse, in contrast,  
239 shows an increase in spike transmission probability for a medium range of ISIs that is explained  
240 by a model dominated by short-term facilitation. Lastly, the VB-Barrel connection shows a higher  
241 postsynaptic response for spikes following longer ISIs (isolated) that is explained by the model as  
242 an effect of short-term synaptic depression.

243 In addition to separating the factors affecting spike transmission, the model also improves the  
244 prediction of postsynaptic spike timing. To evaluate how spike prediction accuracy is influenced  
245 by STP, we compare the prediction of postsynaptic spiking activity after each presynaptic spike  
246 for our model with a static model containing all components except STP. In all three datasets, a  
247 model with short-term synaptic plasticity provides substantially better predictions of the  
248 postsynaptic spiking activity, assessed by Receiver Operating Characteristics (ROC) curves. For

249 the model with short-term synaptic plasticity accuracies were AUC=0.76, 0.70, and 0.79 for the  
250 Thalamus pair, VB-Barrel, and ANF-SBC connections, respectively; compared to a model without  
251 STP where the model accuracies were AUC=0.54, 0.48, and 0.56.

252 In our model, STP is described by two coupled differential equations with five parameters:  $\theta_{stp} =$   
253  $\{\tau_d, \tau_f, U, f, \tau_s\}$  (see Methods). Here we estimate values for depression, facilitation, and  
254 membrane time-constants along with release probability,  $U$ , and magnitude of facilitation,  $f$ , (Fig.  
255 3B). Our result for the thalamus pair shows a higher release probability and depression time-  
256 constant with a larger membrane time constant. The VB-Barrel connection shows a higher  
257 depression compared to facilitation time constant with a lower membrane time constant. The ANF-  
258 SBC synapse shows a lower release probability compared to the other two connections and a lower  
259 depression and membrane time constant. Although here we estimate these parameters from pre-  
260 and postsynaptic spiking alone, they could also be estimated from intracellular measurements [38].  
261 We are not aware of any *in vivo* experiments that measured depression or facilitation time-  
262 constants for these systems. However, previous *in vitro* studies found a wide range of paired-pulse  
263 ratios (0.3 to 0.9) in thalamocortical projections [39], consistent with the depressing VB-Barrel  
264 synapse here. Additionally, *in vitro* observations of ANF-SBC connections report depression time-  
265 constants on the order of 2-25ms in response to a 100 Hz stimulus train [40,41]. These previous  
266 estimates are substantially faster than the time-constants estimated by the TM-GLM for the ANF-  
267 SBC connection here. However, as mentioned in [40], different patterns of presynaptic input (e.g.  
268 regular, Poisson, natural) can result in different time constants, which makes it difficult to compare  
269 *in vitro* and *in vivo* STP parameters directly. One parameter that may be more readily comparable  
270 across preparations is the membrane time-constant. We find that the estimated membrane time-  
271 constant from the TM-GLM for the thalamus pair is consistent with thalamus relay cells observed  
272 intracellularly ( $12.2 \pm 1.1$  ms (n=8)) [42], and the estimated membrane time-constant for ANF-  
273 SBC is approximately consistent with *in vitro* measurements ( $1.05 \pm 0.09$  ms) [40], as well.

274 Previous work modeling intracellular recordings suggests that the full TM model may not be  
275 necessary to explain STP at some, purely depressing synapses [38]. Therefore, we explored how  
276 simplified TM models of STP, with fewer parameters, compare with the full model using the  
277 Akaike information criterion (AIC; see Methods). AIC evaluates model accuracy (log-likelihood)  
278 penalized by the number of parameters and determines if a simplified model with fewer parameters  
279 is preferred over a more complex model. We compare the full model to five reduced models: 1) a  
280 model with only integration, without dynamic release probability and resources ( $\tau_d, \tau_f = 0$  and  
281  $f, U = 1$ ), 2) a facilitation only model ( $\tau_d = 0$ ), 3) a depression only model ( $\tau_f = 0$ ), 4) a 3-  
282 parameter TM model where the magnitude of facilitation is fixed ( $f = U$ ), and 5) a full TM model  
283 without resetting integration when a postsynaptic spike occurs ( $\pi_i = 1$ ). For the thalamus pair and  
284 VB-Barrel, a model with fixed magnitude of facilitation ( $f = U$ ) performs better while for the  
285 ANF-SBC connection the full model gives a better prediction. The full TM model performs well



286 in all cases, but, for some synapses, as previous results suggested [38], there may be ambiguity  
 287 with parameter identifiability where many parameter settings explain the data.

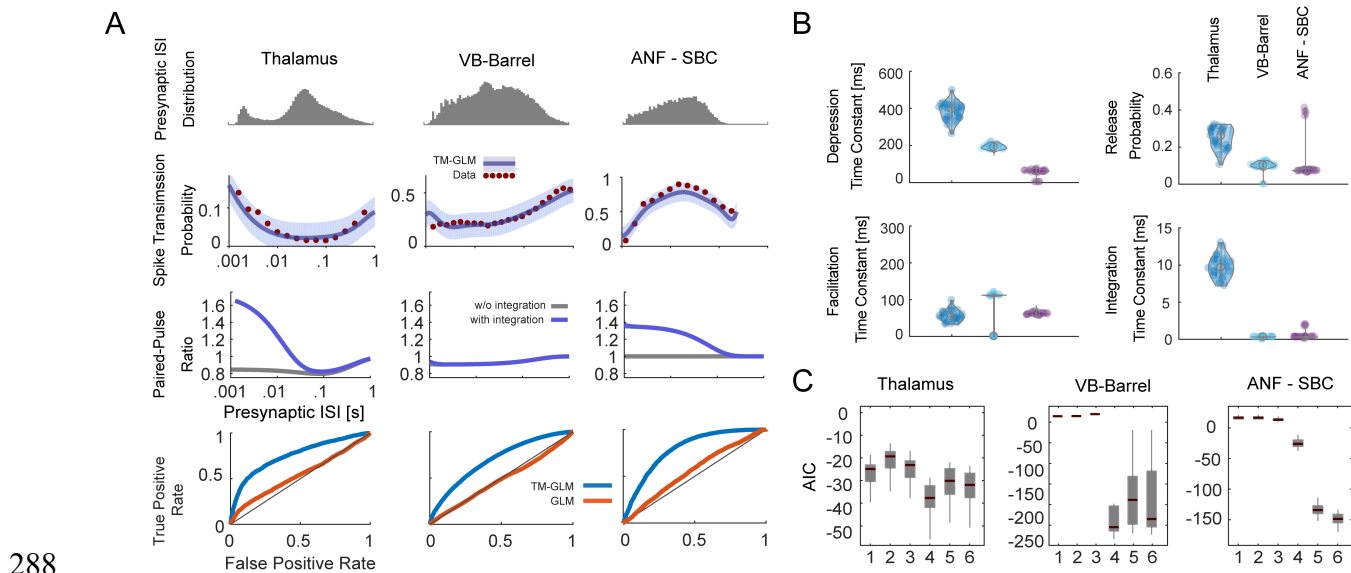

289 **Fig. 3: Model predictions of spike transmission dynamics.** **A:** Spike transmission patterns are  
 290 diverse across different connections. For three different connections (a pair in thalamus,  
 291 ventrobasal thalamus to somatosensory cortex, auditory nerve fiber to spherical bushy cell)  
 292 transmission patterns are explained by a combination of different factors. For each synapse, top  
 293 panels show the presynaptic ISI distributions (log-spaced). In the second row, the observed spike  
 294 transmission probability (red data points) and model predictions (blue with 95% confidence  
 295 bands). We then used the estimated TM parameters for each synapse and simulated responses to  
 296 for paired presynaptic pulses. Blue curves denote the PPRs of the full model, and gray lines denote  
 297 PPRs for a model without synaptic summation. In the fourth row, we evaluate how accurately the  
 298 TM-GLM can prediction individual postsynaptic transmission events. For each individual  
 299 presynaptic spike, we compare the model transmission probability with the observed binary  
 300 outcome. ROC curves show the prediction accuracy for the TM-GLM (blue) and a standard GLM  
 301 without STP (orange). **B:** Estimates for the four STP parameters of the model for each synapse.  
 302 Each dot represents estimation from a distinct bootstrap sample. **C:** Model comparison for 6  
 303 different models (Akaike information criteria relative to a model without plasticity). Models: 1)  
 304 Integration only ( $\tau_d, \tau_f = 0$  and  $f, U = 1$ ), 2) Facilitation only ( $\tau_d = 0$ ), 3) Depression only ( $\tau_f =$   
 305 0), 4) 3-parameter TM ( $f = U$ ), 5) 4-parameter TM without resetting integration ( $\pi_i = 1$ ), 6) 4-  
 306 parameter TM.

### 307 Recent patterns of pre- and postsynaptic spiking shape the synaptic transmission probability

308 Although previous studies have focused largely on how spike transmission probability varies as a  
 309 function of the single preceding presynaptic ISI, synaptic dynamics depend on the full sequence  
 310 of presynaptic spiking. Unlike *in vitro* experiments where the state of the synapse can, to some

311 extent, be controlled before studying responses to a specific presynaptic pattern, *in vivo*  
312 measurements of spike transmission can be heavily influenced by higher-order correlations  
313 between successive ISIs [29]. Additionally, it is difficult to assess the effects of multi-spike  
314 patterns empirically by splitting the correlograms, since the number of observations for any given  
315 presynaptic spike pattern rapidly decreases with the number of spikes in the pattern. Here we  
316 examine how spike transmission depends, not just on the preceding presynaptic ISI, but on triplets  
317 of spikes. We compare the empirically observed spike transmission probability following triplets  
318 to the estimated spike transmission probability from the TM-GLM. Then, after fitting the TM-  
319 GLM, we simulate postsynaptic responses to isolated, local patterns of spikes and determine to  
320 what extent the observed spike transmission patterns are influenced by higher-order correlations  
321 between successive ISIs.

322 First, in addition to the timing of the two preceding presynaptic spikes ( $ISI_1$ ), we split correlograms  
323 based on the timing of the three preceding presynaptic spikes using both  $ISI_1$  and  $ISI_2$ . Since the  
324 TM-GLM provides estimates of the post-synaptic spike probability following every presynaptic  
325 spike, we can split both the data and model fits the same way (Fig. 4A). We find that the spike  
326 transmission patterns clearly depend on the triplet patterns of presynaptic spikes. That is, the spike  
327 transmission probability is influenced by both  $ISI_1$  and  $ISI_2$ , and their interaction differed between  
328 synapses, as expected from the TM-GLM model. However, similar to the descriptions of spike  
329 transmission as a function of  $ISI_1$ , the TM-GLM accurately captures the patterns of spike  
330 transmission for triplets of presynaptic spikes at those three synapses. In the thalamus pair, spike  
331 transmission was dominated by  $ISI_1$ , and the effect of  $ISI_2$  appears to be weak or, at least, doesn't  
332 appear to be monotonic. Spike transmission at the VB-Barrel connection depends strongly on both  
333  $ISI_1$  and  $ISI_2$ , with higher spike transmission probability for longer  $ISI_2$ , consistent with recovery  
334 from depression. Lastly, for the ANF-SBC connection, transmission probabilities decrease for  
335 shorter  $ISI_2$ , but there also appears to be a strong interaction between  $ISI_1$  and  $ISI_2$ , where  
336 transmission probability is high for multiple combinations of these two intervals (e.g. intervals of  
337 10ms then 100ms and intervals of 100ms then 10ms both result in high probability transmission).

338 To examine to what extent the empirical observations of spike transmission are affected by higher-  
339 order correlations between successive ISIs, we again use the estimated parameters in the TM-GLM  
340 to simulate postsynaptic responses to hypothetical, isolated triplets of presynaptic spikes. In these  
341 simulations we fix the post-spike history effect and the excitability in the model to their average  
342 values from model fits, and we fix the initial STP state (initial values of  $R$  and  $u$  in TM model) for  
343 the first spike in triplets to the average  $R$  and  $u$  values from the model fits. In experimental data,  
344 the initial state of the pre- and postsynaptic neurons before the triplets occur can wildly differ  
345 between different values of  $ISI_1$  and  $ISI_2$ . By simulating, we can compare the influence of different  
346 triplets ( $ISI_1$  and  $ISI_2$ ) when the pre- and postsynaptic neurons start at the same state. Here we find  
347 that for the thalamus pair, although the empirical data showed no clear effect for  $ISI_2$ , the simulated  
348 spike transmission probability increases with short  $ISI_2$ , consistent with strong synaptic  
349 summation. One reason that this effect may be masked in the empirical transmission probabilities

350 is that post-spike history effects could act to decrease the probability of future postsynaptic spikes.  
351 For the VB-Barrel simulations, we find that short  $ISI_2$  decreases transmission probability,  
352 consistent with the empirical transmission patterns, although less pronounced. Serial correlations  
353 in the sequence of presynaptic spikes (such as long bursts) could act to accentuate the depression  
354 in the empirical observations beyond what we see with the simulated responses to isolated triplets.  
355 Finally, for the ANF-SBC, although the empirical transmission probability showed decreased  
356 transmission for short  $ISI_2$ , the simulated responses to isolated patterns have increasing  
357 transmission at short  $ISI_2$  (due to synaptic summation). This difference is likely due to the post-  
358 spike history effects, which has been fixed for the simulations, but can have a large effect in the  
359 experimental data. Since the overall efficacy of this synapse is quite high ( $>0.7$ ), is likely that a  
360 postsynaptic spike follows the first or second presynaptic spike which then influences the response  
361 to the third spike.

362 To better understand the effects of post-spike history, we examined how the postsynaptic spiking  
363 history changes the spike transmission patterns with a similar approach. In addition to splitting the  
364 correlograms based on  $ISI_1$ , we also split based on the previous postsynaptic ISI,  $ISI_{post}$  (Fig. 4B).  
365 Here, as with the triplets of presynaptic spikes, we find that the spike transmission patterns depend  
366 on the triplet patterns of 2 pre- and 1 postsynaptic spike, and the TM-GLM accurately captures the  
367 patterns of spike transmission at our three synapses (Fig. 4B). Here, for both thalamus and VB-  
368 Barrel pairs, synaptic transmission probability decreases after a long postsynaptic ISI for all values  
369 of  $ISI_1$ . In contrast, the ANF-SBC connection shows decreased transmission probability at short  
370 postsynaptic ISIs.

371 As with the triplets of presynaptic spikes, we then simulate how these local patterns of 2 pre- and  
372 1 postsynaptic spike change spike transmission probability when the neurons start from the same  
373 initial conditions (average values of excitability, post-spike history,  $R$  and  $u$ ). For the thalamus  
374 and VB-Barrel pairs, the simulations of isolated, local patterns match the general trends of  
375 empirical spike transmission. However, for the VB-Barrel synapse, the effect of  $ISI_{post}$  in the  
376 empirical transmission patterns is stronger than in the simulations, suggesting that serial  
377 correlations in ISIs could again play a role and does decrease transmission probability for isolated  
378 patterns. However, as with the responses to triplets of presynaptic spikes, these local patterns alone  
379 are insufficient to explain the empirically observed patterns of spike transmission.

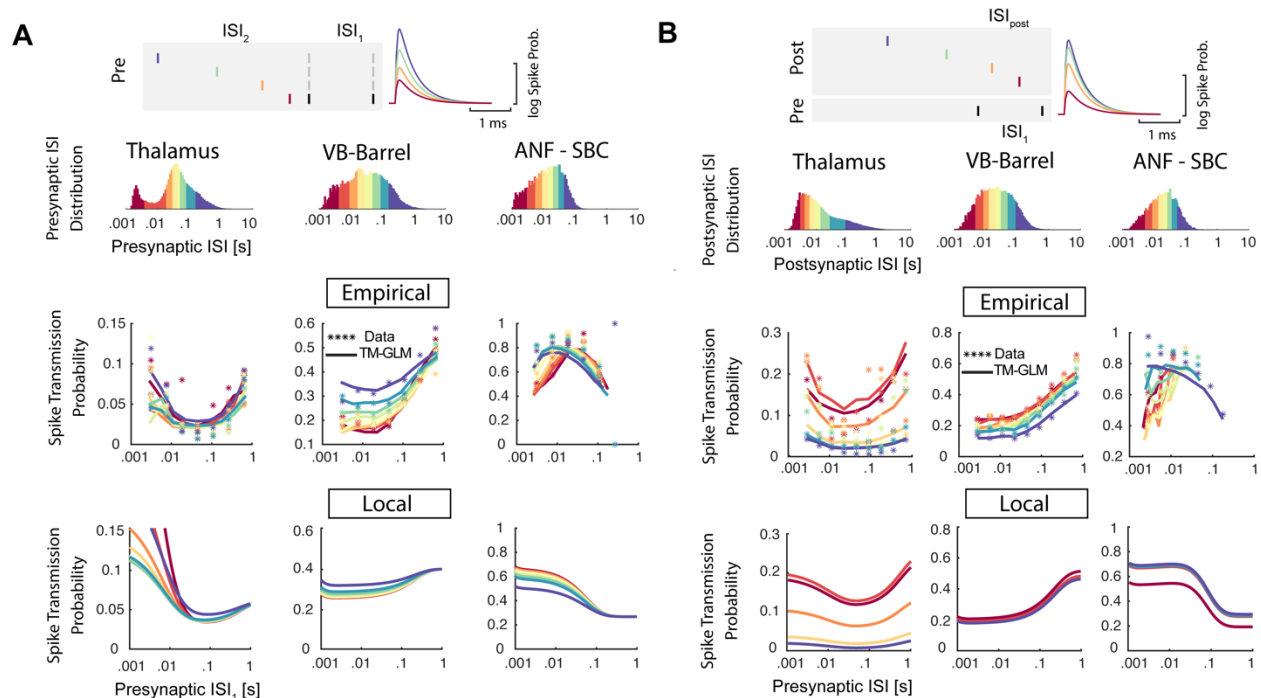

380  
 381 **Fig. 4: Effects of pre- and postsynaptic spiking patterns.** **A:** Synaptic transmission patterns  
 382 change based on the full sequence of presynaptic spiking. Top panel shows a schematic of 4  
 383 different patterns of presynaptic spike triplets with a fixed ISI between the two most recent  
 384 presynaptic spikes (black dashed lines). We split the presynaptic ISI distribution into 8 quantiles.  
 385 Each data point shows the observed spike transmission probability corresponding to the  $ISI_2$   
 386 quantile with the same color. Solid lines are the average estimated probability for each pattern  
 387 under the model (based on the full sequence of observed spikes). To examine the influence of  
 388 serial correlations, we then stimulate model responses to the isolated triplet pattern, assuming the  
 389 synapse is initially in an average state. **B:** Synaptic transmission patterns change depending on the  
 390 history of postsynaptic spiking, as well. Here each data point in the scatter plots shows the spike  
 391 transmission probability of the corresponding to the postsynaptic ISIs of the same color in the ISI  
 392 distribution. Colors represent the corresponding time difference between presynaptic and previous  
 393 postsynaptic spike. Solid lines are the average predicted probability for quantiles with  
 394 corresponding colors. Last row shows simulations of the model using estimated STP parameters  
 395 and fixing the excitability from the model fits to their average values. Here the history effect for  
 396 each ISI interval is set to the post-spike history filter value on that interval.

### 397 Spike transmission patterns change depending on stimulus type

398 These results suggest that the presynaptic spike pattern has a complex effect on spike transmission  
 399 probability. In sensory systems, one variable that affects the presynaptic spike pattern is the  
 400 external stimulus. To examine how differences in stimulus statistics might alter spike transmission,  
 401 we fitted our model to a dataset recorded juxtacellularly from an ANF-SBC synapse, presented  
 402 with *natural sounds*, a range of randomized frequency-level pure-tones (*tuning stimuli*), and

403 *spontaneous activity* in the absence of acoustic stimulation. We merged these three datasets and  
404 fitted the model to the merged dataset. As with the previous fits of the ANF-SBC connection (based  
405 on a different set of *tuning stimuli*), the transmission probability under all three conditions exhibits  
406 a bandpass-like pattern suggesting facilitation and little to no synaptic summation. However, spike  
407 transmission during natural stimuli was markedly different from that during pure tone stimulation.  
408 During natural sounds, transmission probability is maximized at 100 ms rather than 10 ms in the  
409 *tuning stimuli* and during *spontaneous activity*. Further, *natural stimuli* have much lower  
410 transmission probability at short ISIs. Interestingly, the TM-GLM captures the overall facilitation,  
411 but also captures differences due to the different stimuli. In contrast, a static GLM captures almost  
412 none of the variations in spike transmission probability suggesting that a fixed coupling term,  
413 postsynaptic history, and, slow fluctuations of presynaptic spiking are not sufficient to capture  
414 patterns of spike transmission probabilities (Fig. 5A). Together, these results suggest that the  
415 combination of STP, synaptic summation, history, and excitability is sufficient to explain the  
416 observed differences between stimuli, without requiring any additional adaptation or plasticity.

417 Since these recordings were performed juxtacellularly, we also have access to the slope of  
418 individual (extracellular) PSPs, which correlates with the intracellular PSP amplitude. We  
419 compared patterns of individual PSP slopes for each stimulus type and how they correlate with the  
420 estimated coupling amplitude following individual presynaptic spikes in our model (Fig. 5B, 5C).  
421 Note that patterns of PSP slopes do not have the same pattern as spike transmission probability,  
422 since there are other factors (e.g. postsynaptic spiking history) contributing to postsynaptic spiking.  
423 These results show the stimulus-dependence of PSP amplitudes and a static GLM without STP  
424 cannot account for these variations. Although the correlation is not perfect, the model does  
425 correlate with the measured PSP slope, even though the model only has access to spikes. By  
426 modeling dynamic functional connectivity, we can approximately reconstruct the amplitude of  
427 individual synaptic events.

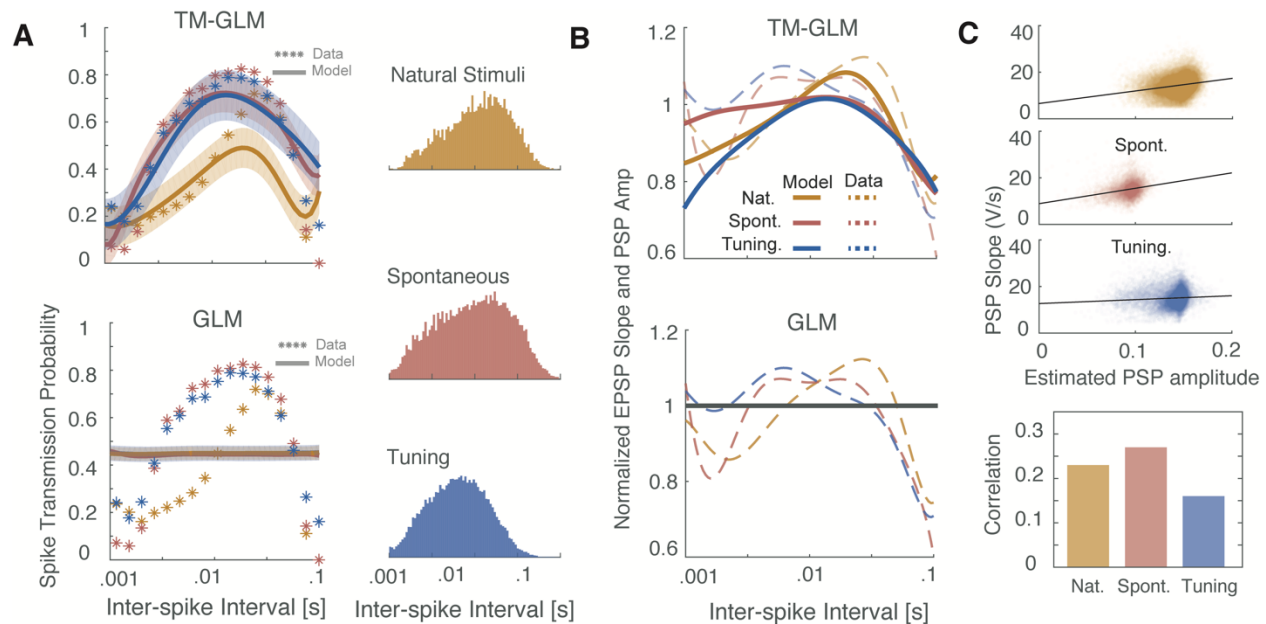

428  
 429 **Fig. 5: The TM-GLM captures stimulus-dependent changes in spike transmission**  
 430 **probability at the ANF-SBC synapse. A)** The TM-GLM captures stimulus-dependent spike  
 431 transmission probability patterns better than a static model without short-term synaptic plasticity.  
 432 Asterisks show spike transmission probability for (log-spaced) presynaptic ISIs during two types  
 433 of auditory stimuli and during spontaneous activity: Natural Sounds (yellow), Spontaneous  
 434 Activity (red), and Tuning Stimuli (blue). Solid lines and 95% confidence bands show model  
 435 predictions for each stimulus type. Corresponding inter-spike interval distributions are shown on  
 436 the right. **B)** The TM-GLM captures changes in extracellularly recorded PSPs. Here the observed  
 437 PSP slope (dashed lines) approximately matches and coupling term in the TM-GLM (solid lines)  
 438 for each three stimuli. Although the spike transmission probability of the static GLM can vary as  
 439 a function of presynaptic ISI due to non-synaptic factors, the coupling term is fixed. **C)** Estimates  
 440 of individual PSP amplitudes predicted by the model and their PSP slopes in the juxtacellular  
 441 recording. Black lines denote linear fits and the bar plot shows the corresponding Spearman  
 442 correlations.

### 443 Postsynaptic cell-type specific changes in spike transmission patterns

444 We applied our model to spiking data from a large-scale multi-electrode array recording to  
 445 investigate the spike transmission dynamics in synapses from putative excitatory neurons to two  
 446 different putative inhibitory subtypes. We detected putative synapses using the log-likelihood ratio  
 447 (LLR < -6, ~200 synapses) between a full model of the correlogram that includes the synaptic  
 448 effect and smooth model of the correlogram that only captures the slow structure (see Methods).  
 449 We then found excitatory-inhibitory microcircuits where putative excitatory neurons (based on the  
 450 cross-correlogram and spike waveform) give inputs to putative inhibitory neurons (41 excitatory  
 451 synapses onto 9 inhibitory neurons in total). To identify inhibitory neurons as inhibitory, we  
 452 required the neuron to have an outgoing connection to a third neuron with a fast, transient decrease

453 in the cross-correlogram. Each of the 9 putative inhibitory neurons here had at least one outgoing  
454 connection where the spiking probability of a downstream neuron decreases  $>18\%$  relative to  
455 baseline following its spiking (Fig. 6A and supplementary figures for individual cross-  
456 correlograms). We then categorized each neuron as a putative fast-spiking (FS,  $n=5$ ) or regular-  
457 spiking (RS,  $n=4$ ) unit based on the spike waveform and firing rate (Fig. 6B). Putative FS units  
458 had narrow-width spike waveforms (half-width of the trough =  $.08 \pm .02$  ms) and higher firing rates  
459 ( $26.07 \pm 9.6$  Hz) compared to putative RS neurons ( $n=4$ ) with broader waveforms (half-width =  
460  $.14 \pm .02$  ms) and lower firing rate ( $10.18 \pm 10.01$  Hz).

461 We identified these microcircuits in different regions with 4 putative excitatory-inhibitory  
462 microcircuits recorded in hippocampus (depth differences:  $77.2 \pm 49.4$   $\mu\text{m}$ ), 3 in thalamus  
463 ( $49.4 \pm 26.2$   $\mu\text{m}$ ), and 2 in motor cortex ( $36.4 \pm 23.5$   $\mu\text{m}$ ). Putative excitatory neurons showed a  
464 wide spike waveform (half-width =  $.18 \pm .04$  ms) similar to the putative regular-spiking inhibitory  
465 neurons, but these two classes can be distinguished by their outgoing connection types (e.g.  
466 inhibitory/excitatory) [43] (Fig. 6B). Average efficacies from putative excitatory-FS connections  
467 ( $.22 \pm .12$ ,  $n=22$ ) were larger, on average, compared to putative excitatory-RS efficacies ( $.13 \pm .13$ ,  
468  $n=19$ ). We then fit the TM-GLM to data from these 41 putative synapses, similar to the three  
469 identified synapses above. We find that the STP parameters for these two types of synapses largely  
470 overlap, except for the membrane time-constant. Interestingly, the membrane time-constants  
471 measured for these inhibitory subtypes *in vitro* overlap with our estimates here (Fig. 6C) [44].  
472 Although *in vitro* studies have not explored the same TM model used here, there is evidence of  
473 postsynaptic cell-type specific STP where putative excitatory-RS connections show facilitation  
474 and putative excitatory-FS connections show depression [5]. Here we find that both connection  
475 types are somewhat facilitating but excitatory-FS connections having a slightly shorter facilitation  
476 time constant. However, unlike what would be expected if excitatory-FS connections were  
477 depressing, the release probability of excitatory-FS connections is lower than for excitatory-RS  
478 connections (Fig. 6C).

479 To better understand synaptic transmission *in vivo* it is important to consider not just the  
480 parameters of the synapse but the full history of presynaptic spiking in the individual presynaptic  
481 neurons. We use the estimated model parameters to simulate responses to a train of regular  
482 presynaptic spikes with the frequency matched to the average firing rate of the corresponding  
483 excitatory input. In simulating postsynaptic responses to the spike train, we fix the excitability and  
484 postsynaptic history to their average values from model fits and set the initial STP state of the first  
485 spike in the train to the average  $R$  and  $u$  values from model fits. With these input-matched  
486 simulations, excitatory-RS connections show a higher postsynaptic potential compared to  
487 excitatory-FS connections (Fig. 6D). Similarly, we simulated the paired-pulse ratio (PPR) at  
488 different inter-stimulus intervals in our TM model following the average state. On average,  
489 connections to regular-spiking inhibitory neurons show a higher PPR (Fig. 6E). For all  
490 connections, we then evaluated the spike prediction accuracy of a model without STP (e.g. static  
491 GLM) with our TM-GLM using the Area Under the ROC Curve (Fig. 6F). The model with STP

492 (TM-GLM) gives more accurate predictions when the postsynaptic neuron spikes following a  
 493 presynaptic spike for our population of 41 putative excitatory-inhibitory connections  
 494 ( $AUC=.69\pm.05$ ) in comparison with the static GLM ( $AUC=.50\pm.03$ ). Altogether, these results  
 495 illustrate how a dynamic model of functional connectivity, such as the TM-GLM, may allow us to  
 496 investigate cell-type-specific differences in short-term synaptic dynamics in behaving animals  
 497 using only pre- and postsynaptic spiking.

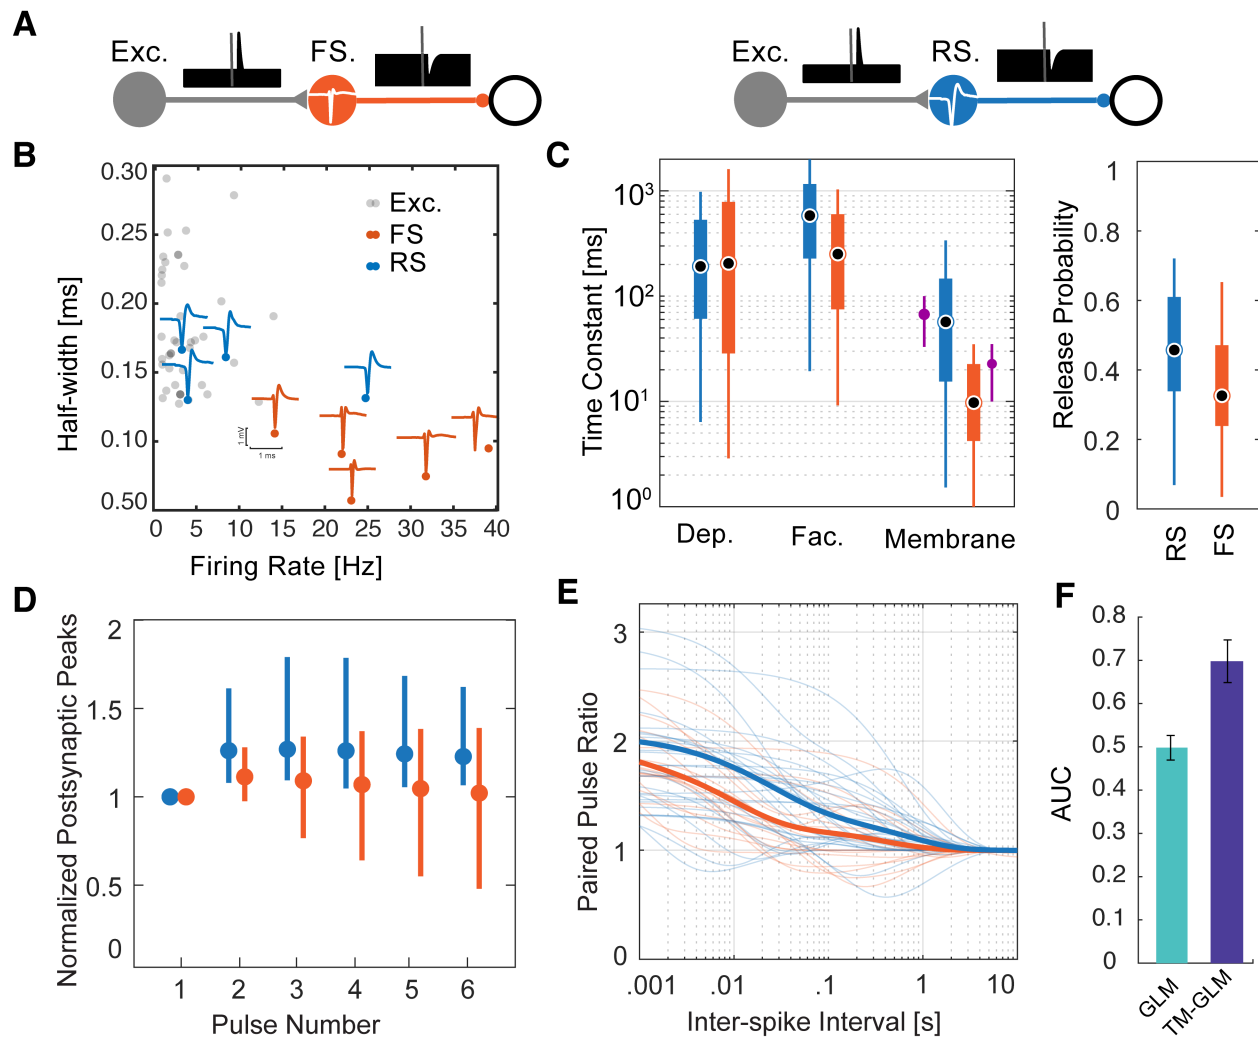

498

499 **Fig. 6: Distinctive short-term synaptic plasticity dynamics in connections between excitatory**  
 500 **neurons to putative Regular-Spiking (RS) and Fast-Spiking (FS) inhibitory neurons.** A) Here  
 501 we examine putative synapses between excitatory neurons and inhibitory neurons (identified by  
 502 their cross-correlations) and separate the putative inhibitory neurons into two classes: fast-spiking,  
 503 which have narrow spike waveforms and high rates (left), and regular-spiking (right), which have  
 504 wide waveforms and lower rates. Identifying these synapses requires both finding both a putative  
 505 excitatory input and a putative inhibitory output for the same neuron. B) Half-widths (of the  
 506 trough) of the spike waveforms and firing rates for the FS (orange) and RS (blue) inhibitory



507 neurons, as well as, their excitatory inputs (grey). Individual blue and orange waveforms  
508 (maximum amplitude across the MEA) are shown for all 9 putative inhibitory neurons. C)  
509 Estimated depression, facilitation, and membrane time-constants for excitatory-RS and excitatory-  
510 FS connections, along with the release probability (right). The purple error-bar next to the  
511 membrane time-constant estimations show the median and standard deviations from *in vitro*  
512 experiments [44]. D) Simulated postsynaptic potential amplitudes estimated from Tsodyks-  
513 Markram model of short-term synaptic plasticity using estimated parameters. For each synapse,  
514 PSPs are estimated in response to a pulse train with inter-pulse intervals set to their corresponding  
515 average presynaptic inter-spike intervals. Dots and error bars denote the median and inter-quartile  
516 range for excitatory-RS (blue) and excitatory-FS (red) connections. E) Simulated Paired-Pulse  
517 Ratio for individual synapses of excitatory-RS (blue) and excitatory-FS (red) connections as a  
518 function of the presynaptic ISI. F) Area Under the Curve (AUC) of postsynaptic spiking prediction  
519 using the static GLM without short-term synaptic plasticity (green) and the TM-GLM with short-  
520 term synaptic plasticity (blue).

## 521 Discussion

522 Short-term synaptic plasticity (STP) has been extensively studied *in vitro* and with intracellular  
523 recordings where the amplitudes of individual postsynaptic potential/currents (PSP/PSCs) can be  
524 directly measured. By using controlled experiments with specific, structured presynaptic spike  
525 patterns these studies established how short-term synaptic dynamics can be described by the  
526 interactions between release probability and vesicles/resource dynamics [36]. These alterations in  
527 PSP/PSP amplitudes can affect the statistics of postsynaptic spiking. Thus, STP could, explain  
528 why the probability of postsynaptic spiking depends not just on the presence of a presynaptic spike,  
529 but on the timing of the most recent presynaptic inter-spike interval [14,16]. However, the  
530 relationship between STP and *in vivo* spike transmission patterns is complex. Patterns of  
531 postsynaptic spike transmission are highly diverse and multiple factors beyond STP and the most  
532 recent presynaptic ISI shape these patterns. Here we aimed to disentangle the different  
533 contributions to spike transmission by developing an augmented generalized linear model, the TM-  
534 GLM that explicitly includes STP dynamics as slow changes in postsynaptic excitability and the  
535 history of postsynaptic spiking.

536 Synapses with different types of STP can allow the same sequence of presynaptic spikes to  
537 generate different patterns of postsynaptic spiking and thereby control the information flow in the  
538 brain. Here we tracked the observed spike transmission probability of three strong synapses from  
539 different species and brain areas. The dynamical spike transmission model enables us to  
540 disentangle different factors (e.g. slow firing rate changes, postsynaptic spiking history, synaptic  
541 summation, and STP) that shape these diverse patterns. First, we investigate the role of STP and  
542 the full sequence of presynaptic spiking activity in shaping the spike transmission patterns. In three  
543 strong synapses (an intra-thalamic synapse, a thalamocortical synapse, and an auditory brainstem  
544 synapse) we show how models of functional connectivity with short-term synaptic plasticity can

545 1) capture diverse pattern of spike transmission probability, 2) disentangle these transmission  
546 patterns to the multiple factors that shape postsynaptic response, 3) extract biologically plausible  
547 synaptic dynamics, and 4) improve prediction of postsynaptic spiking.

548 Estimating static functional connectivity using spike times has revealed network structure in the  
549 retina [26] and hippocampus [45], can reconstruct true physiological circuitry [34], and improves  
550 encoding and decoding [25,26,35]. However, synaptic weights change over a wide range of  
551 timescales depend on external stimuli and behavior [20]. Additionally, synaptic dynamics can  
552 shape information transmission in different ways for different pattern of presynaptic spiking, e.g.  
553 different behavioral tasks. Although, standard GLMs can partially capture the first-order effects of  
554 recent presynaptic spikes on postsynaptic spiking probability, they fail to capture the nonlinear  
555 dynamics of synaptic transmission affected by the whole sequence. Here, in a recording from the  
556 endbulb of Held (ANF-SBC) we found that spike transmission patterns differed for different  
557 stimuli (natural sound stimuli, varying pure tones and without stimulation - e.g. spontaneous  
558 activity), and these differences were well-described by the TM-GLM. Although the STP-  
559 parameters were the same for all stimuli, the different presynaptic spike patterns yield different  
560 synaptic dynamics and different patterns of spike transmission. Since spike transmission  
561 probability in the TM-GLM depends on the full history of presynaptic spiking, this model can  
562 account for changes on behavioral timescales even in the absence of adaptation or other forms of  
563 plasticity (e.g. STDP, LTP).

564 Cell-type specific interactions in layers and regions of the brain perform different computational  
565 tasks. Previous *in vitro* studies have shown that STP dynamics depend on both presynaptic and  
566 postsynaptic cell-types [5]. Here in a large multi-electrode array recording of a freely behaving  
567 mouse we investigated STP dynamics of synaptic connections from putative excitatory neurons to  
568 two different subtypes of putative inhibitory neurons: fast-spiking and regular-spiking. Using  
569 inferred short-term dynamics, predicted responses to train of spikes with the same input  
570 frequencies as the presynaptic neuron in those connections show facilitation in excitatory-RS and  
571 depression in excitatory-FS connections which are in line with previous *in vitro* findings [5].  
572 Moreover, the model with short-term dynamics significantly improves the prediction of  
573 postsynaptic activity. As large-scale extracellular recordings advance, models such as the TM-  
574 GLM are promising to characterize and compare the short-term dynamics of spike transmission of  
575 many different cell types, brain regions, and species.

576 Although our model provides a tool to characterize the dynamics of spike transmission, there are  
577 limitations on how well TM-GLM can capture true synaptic dynamics. Firstly, functional  
578 connections inferred from spikes do not necessarily guarantee anatomical connections. A peak in  
579 the cross-correlogram does not uniquely indicate the presence of a monosynaptic connection  
580 [46,47]. Here we assume that the transient, short-latency increase in postsynaptic spiking activity  
581 following a presynaptic spike indicates the presence of an excitatory monosynaptic connection  
582 [17]. Nevertheless, verifying connections using optogenetics, juxtacellular recordings [48],

583 imaging [49] or anatomical reconstruction provide a more accurate estimate of true anatomical  
584 connections. Secondly, to model short-term dynamics in spiking neurons we employ a rate model  
585 that does not explicitly account for the detailed membrane potential of the postsynaptic neuron.  
586 Other approaches to modeling synaptic transmission with realistic spike-generation mechanisms,  
587 currents, and even dendritic morphology do exist, but are typically less computationally tractable  
588 [50]. Here we employed an augmented GLM with a logistic spike nonlinearity. We chose the  
589 logistic nonlinearity over the conventional exponential function as it appears to better describe  
590 strong connections, such as the ANF-SBC, but other nonlinearities may be better for other neurons  
591 [51]. There are also alternatives to the Tsodyks-Markram model for modeling synaptic dynamics.  
592 The TM model is biologically plausible, but, since it is deterministic, it ignores the stochasticity  
593 of synaptic release and only tracks the dynamics of average postsynaptic potentials. Finally, there  
594 are many covariates that could be added to improve model performance, including local field  
595 potentials, connections to other simultaneously observed presynaptic neurons [35], higher-order  
596 history or coupling terms [52,53], and covariates related to other types of plasticity [52,54–57].  
597 Despite these simplifying assumptions and the fact that we only observe a fraction of inputs to the  
598 neuron, the TM-GLM captures a wide diversity of *in vivo*, excitatory spike transmission patterns.

599 Short-term synaptic plasticity alters information transmission from presynaptic to postsynaptic  
600 neurons by dynamically changing the synaptic efficacy [14,16,36]. Intracellular studies *in vitro* or  
601 with artificial stimulation patterns have shown that short-term synaptic dynamics depend on cell-  
602 types and brain regions [5,58]. However, there is evidence that, in addition to these anatomical  
603 dependencies, short-term synaptic dynamics also depend on stimulus type and the larger  
604 computational function of the neural circuit [59]. To understand how these synaptic dynamics alter  
605 neural computations we will need to study them during natural patterns of presynaptic spiking [60]  
606 and, ultimately, during natural behavior. Since large-scale intracellular recordings are currently  
607 not feasible *in vivo*, here we examined the possibility of using existing large-scale extracellular  
608 recordings to quantify the dynamics of spike transmission and infer the short-term dynamics of  
609 synaptic responses. We find that including STP in models of spiking neurons can capture diverse  
610 patterns of spike transmission, including patterns that are stimulus-dependent and cell-type-  
611 specific. Additionally, these models substantially improve prediction of postsynaptic spiking  
612 following presynaptic spikes and, at least in some cases, can approximately reconstruct individual  
613 PSP amplitudes.

## 614 **Material and methods**

### 615 **Neural Data**

616 To illustrate how synaptic dynamics can be estimated from spikes, we first examined a set of three  
617 strong putative or identified synapses with diverse spike transmission probability patterns: (i) a  
618 dual-electrode recording of a thalamocortical projection in the barrel system, (ii) an *in vivo* loose-  
619 patch (juxtacellular) recording at the calyceal endbulb of Held synapse in the auditory brainstem,  
620 and (iii) a recording from a pair of neurons in the thalamus detected from a larger multi-electrode

621 array (MEA) recording. Next, we applied our model more generally to analyze a large sample of  
622 putative synaptic connections recorded from the MEA dataset. The data from these three identified  
623 strong synapses and the MEA data have been collected from different species, regions, cell-types,  
624 under different stimulation and show a diverse pattern of postsynaptic spiking probability. In all  
625 cases we deduce short-term synaptic dynamics on the basis of only pre- and postsynaptic spike  
626 observations.

627 For the first putative synapse, we use *in vivo* data from simultaneous extracellular recordings in  
628 ventrobasal (VB) thalamic barreloids and topographically aligned, somatosensory cortical barrel  
629 columns (VB-Barrel) in awake, unanesthetized, adult rabbits. Detailed surgical and physiological  
630 methods have been described previously [61]. Spike-triggered averages of the cortical spikes  
631 following spiking of the VB neuron was used to identify connected S1 neurons. Based on the  
632 presence of high frequency discharge (3+ spikes, > 600 Hz) following electrical stimulation of the  
633 thalamus, and narrow spike waveforms, the S1 neuron in this recording was identified as a putative  
634 inhibitory neuron [62]. These recordings identified several putative thalamocortical projections.  
635 The putative synapse that we model here is particularly clear, with 68,345 pre- and 128,096  
636 postsynaptic spikes recorded over the course of 92 minutes of spontaneous activity and has been  
637 previously studied in [14,63].

638 For the second synapse, we examined *in vivo* loose-patch recordings at the Endbulb of Held in  
639 young adult gerbils. Detailed surgical and physiological methods have been previously described  
640 [64]. Briefly, the glass electrode was positioned in the anterior portion of the ventral cochlear  
641 nucleus (AVCN) and single-units were recorded during varying acoustic stimulation. Single units  
642 were classified when recording a positive action potential amplitude of at least 2 mV and showing  
643 the characteristic complex waveform identifying them as large spherical bushy cells (SBC) of the  
644 rostral AVCN. This recording included a mixture of juxtacellular waveforms: an isolated  
645 excitatory PSP (EPSP) or an EPSP followed by a postsynaptic action potential. For both cases the  
646 timing of EPSPs and spikes and rising slope of the EPSPs were extracted. The timing and slope of  
647 the EPSPs were identified using a slope threshold for the rising part of EPSPs as previously  
648 described [65]. We then modeled spike transmission probability patterns for two recordings: (i)  
649 during randomized pure tone acoustic stimulation and (ii) during multiple stimuli, i.e. randomized  
650 frequency-level pure tone stimulation interspaced with spontaneous activity, natural sounds, and  
651 also during spontaneous activity. Using this second dataset, we characterized how variable  
652 presynaptic spike patterns evoked by different stimuli affected the patterns of spike transmission  
653 at the same synapse.

654 We also use MEA spiking data to study the factors shaping spike transmission probability patterns  
655 in a large-scale recording with multiple cell-types. Here we use a previously collected, publicly  
656 available recording from the Cortex Lab at UCL [66,67] with data from two Neuropixels electrode  
657 arrays recorded simultaneously, each with 960 sites (384 active) with lengths of 10-mm and  
658 spacing of  $70 \times 20\text{-}\mu\text{m}$  (<http://data.cortexlab.net/dualPhase3/>). The two electrode arrays span

659 multiple brain areas and ~90 min of data was collected in an awake, head-fixed mouse on a rotating  
660 rubber wheel during visual stimulus presentations. Spikes were automatically detected and sorted  
661 using Kilosort [68] on the broadband (0.3–10 kHz) signal and then manually curated. If two  
662 clusters of spikes had similar waveforms, cross-correlogram features, and spike amplitudes, they  
663 were merged into a single cluster and assigned to a single neuron. In total, 831 well-isolated single  
664 neurons were identified from the two probes in several different brain areas: visual cortex (n=74),  
665 hippocampus (n=64), thalamus (n=244), motor cortex (n=243), and striatum (n=200). Due to the  
666 large number of simultaneously recorded neurons in this dataset, there are many potential synapses  
667 (~831<sup>2</sup>).

## 668 **Synapse Detection:**

669 To identify putative monosynaptic connections between well-isolated single neurons, we looked  
670 for specific patterns in the cross-correlograms [46]. If two neurons are monosynaptically  
671 connected, the probability of postsynaptic spiking increases/decreases rapidly following a  
672 presynaptic spike. In spiking data, this rapid, transient change can be seen in cross-correlograms  
673 as an asymmetric bump/dip in the number of postsynaptic spikes following presynaptic spikes  
674 [18]. For each connection we calculated the cross-correlogram in a 5 ms window before and after  
675 presynaptic spikes with bin-size of 0.1 ms. To avoid aliasing in the cross-correlograms, we added  
676 a small, random shift to each postsynaptic spike drawn uniformly between  $-\Delta t/2$  and  $\Delta t/2$  where  
677  $\Delta t$  is the spike time resolution (0.01 ms in most cases). Here we used a model-based approach  
678 using the cross-correlograms to decide whether two synapses are monosynaptically connected. To  
679 fit the cross-correlogram we used a baseline rate  $\mu$ , a linear combination of B-spline bases  $\mathbf{B}(t)$ ,  
680 and a weighted alpha function to model the synapse,  $w \alpha(t)$ , all passed through an output  
681 nonlinearity;  $\lambda(t) = \exp(\mu + \mathbf{r}\mathbf{B}(t) + w \alpha(t))$ . The alpha function,  $\alpha(t) = (t - t_d)/$   
682  $\tau_\alpha \exp(1 - (t - t_d)/\tau_\alpha)$ , describes the shape of the synaptic potential where  $t_d$  is the synaptic  
683 delay and  $\tau_\alpha$  is the synaptic time-constant [22]. For individual connections, we estimate these  
684 parameters by maximizing the penalized Poisson log-likelihood  $l(\mu, \mathbf{r}, w, t_d, \tau_\alpha) = \sum y_i \log \lambda_i -$   
685  $\sum \lambda_i + \epsilon \|\mathbf{r}\|_2$  where  $y_i$  is the number of postsynaptic spikes observed in the  $i$ -th bin of the  
686 correlogram and  $\|\mathbf{r}\|_2$  regularizes the model to penalize B-spline bases for capturing sharp  
687 increases in the cross-correlogram.  $\epsilon$  is a regularization hyper-parameter which we set to 1 based  
688 on manual search. Due to the parameterization of  $\alpha(t)$ , the log-likelihood is not concave.  
689 However, since the gradient of the log-likelihood can be calculated analytically, we efficiently  
690 optimize the likelihood using LBFGS. During the optimization, the delay and time-constant  
691 parameters are log-transformed, allowing us to use unconstrained optimization, even though they  
692 are strictly positive. We used random restarts to avoid local maxima. To identify putative  
693 monosynaptic connections in the large-scale multi-electrode array data, we compared this model  
694 with a smooth model with slow changes in cross-correlogram and without the synapse,  $\lambda_0(t) =$   
695  $\exp(\mu' + \mathbf{r}'\mathbf{B}(t))$ , using the log-likelihood ratio (LLR) test between our full model with synapse  
696 and the nested smooth model. Since low values of the likelihood ratio mean that the observed result  
697 was better explained with full model as compared to the smooth model, we then visually screened

698 pair-wise connections with lowest ratios (LLR < -6) compared to the null model to find putative  
699 synapses. Out of  $\sim 831^2$  possible connections in this dataset we find  $\sim 200$  putative synapses  
700 (0.03%). We handpicked a strong putative synapse between two thalamic neurons to study its  
701 efficacy pattern in detail alongside the VB-Barrel and ANF-SBC synapses.

702 In addition to this single strong synapse, we also categorize putative pre- and postsynaptic cell  
703 types for the connections detected in the MEA dataset. For this purpose, we assessed single units  
704 based on their cross-correlograms, firing rates, and spike waveforms. We categorized units as  
705 excitatory or inhibitory if, in accordance with Dale's law [69], all outgoing cross-correlograms  
706 showed transient, short-latency (<4ms) increase/decrease in spiking probability [35]. We then  
707 looked into identified inhibitory neurons and categorized them into putative fast-spiking (FS)  
708 and regular-spiking (RS) inhibitory neurons. Using these putative Excitatory-FS and Excitatory-  
709 RS synapses, we then examine how the spike transmission patterns differ for these two subtypes  
710 of inhibitory neurons.

### 711 **Extending a Generalized Linear Model to Account for Short-term Plasticity (TM-GLM)**

712 Short-term synaptic plasticity causes the amplitude of postsynaptic potentials (PSP) to vary over  
713 time depending on the dynamics of synaptic resources and utilization and can be modeled using  
714 the pattern of presynaptic spiking [36,70]. However, changes in the overall postsynaptic spiking  
715 probability cannot be uniquely attributed to changes in amplitudes of postsynaptic potentials. To  
716 accurately describe the dynamics of spike transmission, we also need to account for the membrane  
717 potential summation, the excitability of the postsynaptic neuron (e.g. slow changes in the  
718 presynaptic firing rate) and the dynamics of postsynaptic spiking (e.g. refractory period, after  
719 hyperpolarization current). We developed an extension of a generalized linear model, which we  
720 call a TM-GLM to describe each of these effects. Concretely, the probability of a postsynaptic  
721 spike shortly after each presynaptic spike accounts for the full sequence of previous presynaptic  
722 spiking and the recent history of postsynaptic spiking. We define the conditional intensity of the  
723 postsynaptic neuron after the  $i$ -th presynaptic spike,  $t_s^{(i)}$ , so that the probability of observing a  
724 postsynaptic spike in the  $j$ -th time bin after the  $i$ -th presynaptic spike is given as:

$$725 \lambda_i(t_j) = \sigma \left( \beta_0 + X_c(t_s^{(i)})\beta_c + \sum_{t_r^{(l)} < t_s^{(i)}} X_h(t_s^{(i)} - t_r^{(l)})\beta_h + A_s w_i \alpha(t_j) \right)$$

726 where  $t_r^{(l)}$  are the postsynaptic spike times preceding  $t_s^{(i)}$ . For each presynaptic spike, our model  
727 decomposes the firing rate of the postsynaptic neuron into four effects: a baseline firing rate,  $\beta_0$ ,  
728 slow fluctuations in presynaptic firing rate  $X_c\beta_c$ , history effects from the recent postsynaptic spikes  
729 (prior to  $t_s^{(i)}$ ),  $X_h\beta_h$ , and a time-varying coupling effect from the presynaptic input,  $A_s w_i \alpha(t)$  (Fig.  
730 7).

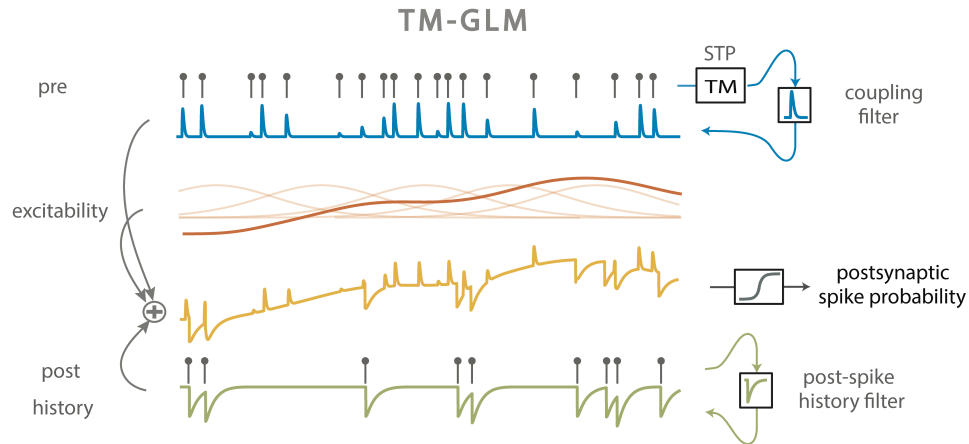

731 **Fig. 7: TM-GLM.** Postsynaptic spiking probability before passing the spiking nonlinearity  
 732 (yellow) changes as a linear combination of presynaptic coupling term with STP dynamics (blue),  
 733 postsynaptic spiking history (green), the postsynaptic excitability (red). Transparent red curves  
 734 show the bases of slow changes in postsynaptic probability at presynaptic spike times ( $X_c$ ).  
 735

736 Here we model slow fluctuations in the postsynaptic rate  $X_c\beta_c$  with a linear combination of B-  
 737 splines with equally spaced knots every 50 seconds of recording time. In the history term, splines  
 738 ( $X_h$ ) span a period of 10 ms prior to each presynaptic spike with 4 logarithmically-spaced knots.  
 739 By scaling  $\alpha(t_j)$  with a multiplicative factor,  $w_i$ , the strength of a synapse can vary over time and,  
 740 in this case, depends on the detailed sequence of presynaptic spiking and their corresponding inter-  
 741 spike intervals.  $A_s$  is the magnitude of the synaptic strength. In this case we use a model for short-  
 742 term synaptic plasticity that allows both depression (where the  $w_i$  decreases for shorter presynaptic  
 743 ISIs) and facilitation (where the  $w_i$  increases for shorter presynaptic ISIs), and incorporates  
 744 membrane summation. To model these effects,  $w_i$  is determined by a nonlinear dynamical system  
 745 based on the Tsodyks and Markram (TM) model [36,71] where:  $w_i = w_{i-1} \exp\left(-\frac{t_s^{(i)} - t_s^{(i-1)}}{\tau_s}\right) \pi_i +$   
 746  $R_i u_i$ , where  $\tau_s$  is the membrane time-constant and the first term of the equation describes how  
 747 postsynaptic membrane potential summation increases the probability of postsynaptic spiking.  
 748 This membrane summation will be ignored if there is a postsynaptic spike:  $\pi_i =$   
 749  $\{0 \text{ if } t_s^{(i-1)} < t_r^{(i-1)} < t_s^{(i)}; 1 \text{ otherwise}\}$ . In the second term of this equation,  $R$  represents the  
 750 dynamics of resources and  $u$  describes their utilization.

751 
$$R_i = 1 - [1 - R_{i-1}(1 - u_{i-1})] \exp\left(-\frac{t_s^{(i)} - t_s^{(i-1)}}{\tau_d}\right)$$

752 
$$u_i = U + [u_{i-1} + f(1 - u_{i-1}) + U] \exp\left(-\frac{t_s^{(i)} - t_s^{(i-1)}}{\tau_f}\right)$$

753 where  $\tau_d$  and  $\tau_f$  are the depression and facilitation time-constants.  $U$  is the release probability and  
754  $f$  is the magnitude of facilitation. To make the estimation more tractable, we approximate the full  
755 optimization problem and estimate synaptic delay,  $t_d$ , and time-constant,  $\tau_\alpha$ , by fitting  $\alpha(t)$  using  
756 the full cross-correlogram, as above. We fix these parameters for the rest of the optimization  
757 process. We then maximize a penalized, Bernoulli log-likelihood  $l(\theta) = \sum \sum [y_{ij} \lambda_i(t_j) -$   
758  $(1 - y_{ij})(1 - \lambda_i(t_j))] + \gamma \|\theta'_{stp}\|_2$  where  $\gamma = 1$  is the regularization hyperparameter to estimate  
759 the parameters:  $\theta = \{\beta_0, \beta_{c=1:C}, \beta_{h=1:H}, A_s, \theta_{stp}\}$ ,  $\theta_{stp} = \{\tau_d, \tau_f, U, f, \tau_s\}$ .

760 As with previous applications of GLMs, we assume that bins are conditionally independent given  
761 the covariates, but unlike many other GLMs, here we only calculate the log-likelihood during short  
762 intervals (5ms) after presynaptic spikes. With  $y_{ij}$  being a binary value representing the presence  
763 of a postsynaptic spike in the  $j$ -th time bin after the  $i$ -th presynaptic spike. We again used a  
764 logarithmic transformation for the time-constants to avoid negative values and logit transformation  
765 for  $U$  and  $f$  to bound their values in the interval  $[0, 1]$ ;  $\theta'_{stp} =$   
766  $\{\log(\tau_d), \log(\tau_f), \text{logit}(U), \text{logit}(f), \log(\tau_s)\}$ . By modeling STP this model is no longer a strict  
767 GLM, and the log-likelihood may have local maxima. Here we use random restarts to avoid local  
768 maxima in our optimization process. The parameters of each restart  $\{\beta_0, \beta_{c=1:C}, \beta_{h=1:H}, A_s\}$  are  
769 initialized by adding noise ( $\sim N(0,1)$ ) to the corresponding parameters in a standard GLM. We  
770 initialize the plasticity parameters with  $\tau'_d{}^{(0)} \sim N(-1,5)$ ,  $\tau'_f{}^{(0)} \sim N(-1,5)$ ,  $U'^{(0)} \sim N(0,5)$ ,  
771  $f'^{(0)} \sim N(0,5)$ ,  $\tau'_s{}^{(0)} \sim N(-3,5)$ . We then use an LBFGS algorithm to optimize the log-likelihood  
772 where we calculate all derivatives analytically except for derivatives of  $\theta_{stp}$  which we calculate  
773 numerically. To estimate the uncertainty of the parameters, we bootstrap the data from each of the  
774 strong synapses by chunking the whole recording time into samples of 50 seconds then resampling  
775 the chunks to generate a new spike train with the same original length.

## 776 **Calculating spike transmission probability**

777 To demonstrate how the probability of postsynaptic spiking changes according to the  
778 corresponding presynaptic inter-spike intervals, we estimated spike transmission probabilities  
779 from the cross-correlograms directly instead of using a model. To calculate this probability, we  
780 focused on a transmission interval after the presynaptic spike where the conditional intensity (when  
781 corrected for the baseline rate) goes above 10% of the maximum of  $\alpha(t)$ . We split the presynaptic  
782 inter-spike interval distribution into log-spaced intervals, and, for each interval, we calculate the  
783 ratio between numbers of postsynaptic spikes in the transmission interval to the number of  
784 presynaptic spikes. Unlike previous studies [14,61] we do not correct this probability for the  
785 baseline postsynaptic rate. The uncorrected probability allows us to more directly compare the  
786 model predictions to the empirical spike transmission probabilities. Since our model gives an  
787 estimate of the postsynaptic probability after each individual presynaptic spike, we can average  
788 over the same transmission interval. However, we know if there is a postsynaptic spike in the



789 transmission interval, probability of a postsynaptic spike goes to  $\sim 0$  for all consecutive bins due to  
790 the post-spike dynamics (e.g. refractory period). Therefore, we measure the predicted probability  
791 of a postsynaptic spike in a 5ms window after  $i$ -th presynaptic spike from binned  $\lambda_i(t_j)$  as follows:  
792  $z_i = \sum_{j=1}^L \lambda_i(t_j) \prod_{m=1}^{j-1} (1 - \lambda_i(t_m))$ . Here we assume conditional independence of the  $j$ -th bin  
793 after a presynaptic spike, but we enforce a refractory period for all bins after a postsynaptic spike  
794 in our generative model. Here  $L$  is the first bin that  $y_{ij}$  is nonzero.  $z_i$  represents the probability of  
795 postsynaptic spiking after each presynaptic spike and we fit a smooth curve over the distribution  
796 of  $z_i$ 's and their corresponding inter-spike intervals to compare with the empirical spike probability  
797 patterns.

### 798 **Modeling the effect of local patterns of pre- and postsynaptic spiking**

799 The observed and modeled spike transmission patterns, as calculated above, reflect the expected  
800 postsynaptic spike probability given a specific presynaptic ISI. However, since the presynaptic  
801 ISIs are not independent and there are serial correlations in ISIs, the detailed sequence of the pre-  
802 and postsynaptic spiking likely affects the shapes of these curves. To quantify the effects of serial  
803 ISI correlations on the model of spike transmission probability we demonstrate how local patterns  
804 of presynaptic spiking modifies spike transmission patterns in the data and the model. For each of  
805 the three strong identified synapses we measure postsynaptic spiking probability in response to  
806 presynaptic spike triplets. Due to the limited number of spikes in our data, we divide the  
807 presynaptic ISI distribution into few log-spaced intervals and measure the postsynaptic spiking  
808 probability for triplets with the two ISIs that fall in those intervals. Similarly, we measure the  
809 predicted postsynaptic probability in response to the presynaptic triplets. After measuring  
810 postsynaptic responses to presynaptic spike triplets in the data and the model, we simulate the  
811 contribution of STP in shaping the transmission pattern in response to these triplets. To factor out  
812 contributions of the postsynaptic history and slow changes in presynaptic firing rate, we fix the  
813 corresponding values in the model to their average values within the model. In these simulations,  
814 we also fix the initial values of the STP dynamics in the TM model for the first spike of the triplets  
815 to the average  $R$  and  $u$  within the model. This approach enables us to illustrate how short-term  
816 synaptic plasticity in triplets of presynaptic spikes changes spike transmission probability and how  
817 serial correlations in presynaptic spiking affect spike transmission probability.

818 The postsynaptic spike history and the serial correlations between the pre- and postsynaptic spiking  
819 also modify spike transmission probability patterns. To investigate history effects in the local  
820 pattern of pre- and postsynaptic spikes, we measured the postsynaptic spiking probability in  
821 response to two presynaptic spikes and a postsynaptic spike preceding the most recent presynaptic  
822 spike. Due to the limited number of spikes and sparseness of the split cross-correlograms, we again  
823 divided the presynaptic and postsynaptic ISI distributions into a few log-spaced intervals. We then  
824 measure the spike transmission probability for a group of presynaptic spikes that their preceding  
825 presynaptic ISIs and postsynaptic spike ISIs fall into different combinations of pre- and  
826 postsynaptic log-spaced intervals. After measuring postsynaptic responses to any possible

827 combination of the two most recent presynaptic spikes and their postsynaptic spikes in the data  
828 and the model, we simulate the contribution of the history and STP together in shaping the  
829 transmission. In our simulation the excitability was set to the model estimates. To measure the  
830 effects of postsynaptic spiking history, for each postsynaptic ISI, we fix the history contribution  
831 to estimated post-spike history filter value at that postsynaptic ISI. We then use the predicted STP  
832 parameters from the data to simulate the STP contribution in response to paired pulses of  
833 presynaptic ISIs where we again fix the initial values of the TM model for the first presynaptic  
834 spike to the average  $R$  and  $u$  within the model. This approach enables us to illustrate how short-  
835 term synaptic plasticity in local patterns of two presynaptic spikes and a postsynaptic spike  
836 changes spike transmission probability and quantifies how serial correlations between pre- and  
837 postsynaptic spiking affect spike transmission probability.

### 838 **Evaluating prediction accuracy**

839 In addition to evaluating the estimated parameters and comparing the model to empirical spike  
840 transmission probabilities, we also assess how accurately the model can predict postsynaptic  
841 spiking. Not only can we predict the probability of a spike given specific presynaptic ISIs, but we  
842 can also predict whether there will be a postsynaptic spike following each individual presynaptic  
843 spike. To quantify how well the predicted postsynaptic spike probability,  $z_i$ , predicts the  
844 postsynaptic spiking activity, we use Receiver Operating Characteristic (ROC) curves. To compute  
845 the ROC curve, we first create a threshold version of  $z_i$  which operates as our prediction:  $\{\hat{r}_i =$   
846  $1\}$  if  $(z_i > \text{thr})$ ; 0 otherwise. Changing the threshold from 0 to 1 traces out a relationship between  
847 the true positive rate (TPR) and false positive rate (FPR). The area under the ROC curve (AUC)  
848 reflects the performance of each model, where a perfect classifier has  $\text{AUC}=1$  and a random  
849 classifier has  $\text{AUC}=0.5$ . Effectively, the AUC is the probability of a randomly chosen spike having  
850 a higher model probability than a randomly chosen non-spike [72]. Here we calculate the AUC for  
851 short intervals ( $\sim 5\text{ms}$ ) after presynaptic spikes and check whether we detect a postsynaptic spike  
852 in the transmission interval where  $\alpha(t)$  is above 10% of its maximum. Here we compare the AUC  
853 for the static model of connectivity without short-term synaptic plasticity with our dynamical  
854 model.

### 855 **A simplified rate model to simulate effects of synaptic summation and post-spike history**

856 Our TM-GLM's prediction of the spike transmission pattern is data-driven and depends on the full  
857 history of pre- and postsynaptic spiking. To better understand and illustrate how STP, synaptic  
858 summation, and post-spike history interact to create the observed patterns of spike transmission,  
859 we simulated postsynaptic responses in a simplified voltage model. Namely, we consider PSP  
860 summation in response to a pattern of two presynaptic spikes. We assume that the synapse is  
861 initially fully recovered, and the PSC amplitudes are determined by the 4-parameter TM model with  
862  $U = 0.7$ ,  $\tau_d = 1.7$ ,  $\tau_f = 0.02$ ,  $f = 0.05$  for the depressing synapse and  $U = 0.1$ ,  $\tau_d = 0.02$ ,  $\tau_f =$   
863  $1$ ,  $f = 0.11$  for the facilitating synapse [28]. We then convolve the PSCs (delta function kernel)  
864 with a PSP kernel,  $\exp(-t/\tau_v) - \exp(-t/\tau_r)$ , with  $\tau_v = .01$  and  $\tau_r = .001$  ms to describe synaptic

865 summation. We assume that the instantaneous postsynaptic spike probability is simply a nonlinear  
866 function of the distance to a threshold voltage  $\sigma(5(V(t) - V_{th}))$  where  $\sigma(x) = 1/(1 + e^{-x})$  and  
867  $V_{th} = .5, .75,$  and  $1$  correspond to strong, moderate, and weak inputs respectively. The spike  
868 transmission probability sums this instantaneous probability over a window of 20ms after each  
869 presynaptic spike. Finally, we adjust the spike transmission probability for the second PSP to  
870 account for potential post-spike history effects. Namely, we assume that the adjusted spike  
871 transmission probability for the second spike is  $p_2^* = (1 - p_1)p_2 + p_1p_2f_{ahp}$  where  $p_1$  is the  
872 transmission probability for the first spike,  $p_2$  is the unadjusted probability for the second spike,  
873 and  $f_{ahp}$  is the effect of the after-hyperpolarization. Here we use  $f_{ahp}(\Delta t) = (\sigma(150(\Delta t -$   
874  $0.02)) - c)/d$  where  $\Delta t$  is the presynaptic ISI, and  $c$  and  $d$  are constants ensuring that  $f_{ahp}(0) =$   
875  $0$  and  $f_{ahp}(\infty) = 1$ . Although this simulation is highly simplified, it demonstrates how the  
876 observed spike transmission pattern depends, not just on the type and timescale of STP, but on the  
877 interaction between STP, synaptic summation, after-hyperpolarization effects, and the spike  
878 nonlinearity.

## 879 Acknowledgements

880 Thanks to Nick Steinmetz for providing MEA dataset. AG, NR, and IHS were supported by NSF  
881 CAREER 1651396 to IHS.

## 882 References

- 883 1. Abbott LF, Nelson SB. Synaptic plasticity: taming the beast. *Nat Neurosci.* 2000;3: 1178–  
884 1183. doi:10.1038/81453
- 885 2. Abbott LF, Regehr WG. Synaptic computation. *Nature.* 2004. doi:10.1038/nature03010
- 886 3. Zucker RS, Regehr WG. Short-term synaptic plasticity. *Annu Rev Physiol.* 2002;64: 355–  
887 405. doi:DOI 10.1146/annurev.physiol.64.092501.114547
- 888 4. Regehr WG. Short-term presynaptic plasticity. *Cold Spring Harb Perspect Biol.* 2012;  
889 doi:10.1101/cshperspect.a005702
- 890 5. Thomson AM, Lamy C. Functional maps of neocortical local circuitry. *Front Neurosci.*  
891 *Frontiers*; 2007;1: 19–42. doi:10.3389/neuro.01.1.1.002.2007
- 892 6. Dittman JS, Kreitzer AC, Regehr WG. Interplay between facilitation, depression, and  
893 residual calcium at three presynaptic terminals. *J Neurosci.* 2000; doi:10.1523/JNEUROSCI.20-  
894 04-01374.2000
- 895 7. Wang Y, Markram H, Goodman PH, Berger TK, Ma J, Goldman-Rakic PS. Heterogeneity  
896 in the pyramidal network of the medial prefrontal cortex. *Nat Neurosci.* 2006;9: 534–542.  
897 doi:10.1038/nm1670
- 898 8. Fortune ES, Rose GJ. Short-term synaptic plasticity as a temporal filter. *Trends Neurosci.*  
899 2001;24: 381–385. doi:10.1016/S0166-2236(00)01835-X

- 900 9. Cook DL, Schwindt PC, Grande LA, Spain WJ. Synaptic depression in the localization of  
901 sound. *Nature*. 2003;421: 66–70. doi:10.1038/nature01248
- 902 10. Mongillo G, Barak O, Tsodyks M. Synaptic theory of working memory. *Science*.  
903 2008;319: 1543–1546. doi:10.1126/science.1150769
- 904 11. Abbott LF. Synaptic Depression and Cortical Gain Control. *Science* (80- ). 1997;275: 221–  
905 224. doi:10.1126/science.275.5297.221
- 906 12. Lindner B, Gangloff D, Longtin A, Lewis JE. Broadband Coding with Dynamic Synapses.  
907 *J Neurosci*. 2009;29: 2076–2087. doi:10.1523/JNEUROSCI.3702-08.2009
- 908 13. Drew PJ, Abbott LF. Extending the effects of spike-timing-dependent plasticity to  
909 behavioral timescales. *Proc Natl Acad Sci*. 2006;103: 8876–8881. doi:10.1073/pnas.0600676103
- 910 14. Swadlow HA, Gusev AG. The impact of “bursting” thalamic impulses at a neocortical  
911 synapse. *Nat Neurosci*. 2001;4: 402–8. doi:10.1038/86054
- 912 15. Usrey WM, Reppas JB, Reid RC. Paired-spike interactions and synaptic efficacy of retinal  
913 inputs to the thalamus. *Nature*. 1998; doi:10.1038/26487
- 914 16. English DF, McKenzie S, Evans T, Kim K, Yoon E, Buzsáki G. Pyramidal Cell-  
915 Interneuron Circuit Architecture and Dynamics in Hippocampal Networks. *Neuron*. 2017;96: 505–  
916 520. doi:10.1016/j.neuron.2017.09.033
- 917 17. Perkel DH, Gerstein GL, Moore GP. Neuronal spike trains and stochastic point processes.  
918 II. Simultaneous spike trains. *Biophys J*. 1967;7: 419–440. Available:  
919 <http://www.ncbi.nlm.nih.gov/pmc/articles/PMC1368069/>
- 920 18. Barthó P, Hirase H, Monconduit L, Zugaro M, Harris KD, Buzsáki G. Characterization of  
921 Neocortical Principal Cells and Interneurons by Network Interactions and Extracellular Features.  
922 *J Neurophysiol*. 2004;92: 600–608. doi:10.1152/jn.01170.2003
- 923 19. Csicsvari J, Hirase H, Czurko A, Buzsáki G. Reliability and state dependence of pyramidal  
924 cell-interneuron synapses in the hippocampus: An ensemble approach in the behaving rat. *Neuron*.  
925 1998;21: 179–189. doi:10.1016/S0896-6273(00)80525-5
- 926 20. Fujisawa S, Amarasingham A, Harrison MT, Buzsáki G. Behavior-dependent short-term  
927 assembly dynamics in the medial prefrontal cortex. *Nat Neurosci*. 2008;11: 823–833.  
928 doi:10.1038/nn.2134
- 929 21. Usrey WM, Alonso JM, Reid RC. Synaptic interactions between thalamic inputs to simple  
930 cells in cat visual cortex. *J Neurosci*. 2000;20: 5461–5467. doi:20/14/5461 [pii]
- 931 22. Carandini M, Horton JC, Sincich LC. Thalamic filtering of retinal spike trains by  
932 postsynaptic summation. *J Vis*. 2007;7: 20. doi:10.1167/7.14.20
- 933 23. Trussell LO, Zhang S, Ramant IM. Desensitization of AMPA receptors upon multiquantal  
934 neurotransmitter release. *Neuron*. 1993;10: 1185–1196. doi:10.1016/0896-6273(93)90066-Z
- 935 24. Henze DA, Buzsáki G. Action potential threshold of hippocampal pyramidal cells in vivo  
936 is increased by recent spiking activity. *Neuroscience*. 2001;105: 121–130. doi:10.1016/S0306-  
937 4522(01)00167-1

- 938 25. Truccolo W, Eden UT, Fellows MR, Donoghue JP, Brown EN, John P. A Point Process  
939 Framework for Relating Neural Spiking Activity to Spiking History, Neural Ensemble, and  
940 Extrinsic Covariate Effects. *J Neurophysiol.* 2005;93: 1074–1089. doi:10.1152/jn.00697.2004
- 941 26. Pillow JW, Shlens J, Paninski L, Sher A, Litke AM, Chichilnisky EJ, et al. Spatio-temporal  
942 correlations and visual signalling in a complete neuronal population. *Nature.* Macmillan Publishers  
943 Limited. All rights reserved; 2008;454: 995–9. doi:10.1038/nature07140
- 944 27. Harris K, Csicsvari J, Hirase H, Dragoi G, Buzsáki G. Organization of cell assemblies in  
945 the hippocampus. *Nature.* 2003;424: 552–556. doi:10.1038/nature01765.1.
- 946 28. Ghanbari A, Malyshev A, Volgushev M, Stevenson IH. Estimating short-term synaptic  
947 plasticity from pre- and postsynaptic spiking. *PLoS Comput Biol.* 2017;  
948 doi:10.1371/journal.pcbi.1005738
- 949 29. Stoelzel CR, Bereshpolova Y, Gusev AG, Swadlow HA. The Impact of an LGNd Impulse  
950 on the Awake Visual Cortex: Synaptic Dynamics and the Sustained/Transient Distinction. *J*  
951 *Neurosci.* 2008; doi:10.1523/JNEUROSCI.4726-07.2008
- 952 30. Stoelzel CR, Bereshpolova Y, Swadlow HA. Stability of Thalamocortical Synaptic  
953 Transmission across Awake Brain States. *J Neurosci.* 2009; doi:10.1523/JNEUROSCI.5983-  
954 08.2009
- 955 31. Thomson AM, West DC, Wang Y, Bannister AP. Synaptic Connections and Small Circuits  
956 Involving Excitatory and Inhibitory Neurons in Layers 2-5 of Adult Rat and Cat Neocortex: Triple  
957 Intracellular Recordings and Biocytin Labelling In Vitro. *Cereb Cortex.* Oxford University Press;  
958 2002;12: 936–953. doi:10.1093/cercor/12.9.936
- 959 32. Yang H, Xu-Friedman MA. Impact of Synaptic Depression on Spike Timing at the Endbulb  
960 of Held. *J Neurophysiol.* 2009; doi:10.1152/jn.00072.2009
- 961 33. Yang H, Xu-Friedman MA. Relative Roles of Different Mechanisms of Depression at the  
962 Mouse Endbulb of Held. *J Neurophysiol.* 2008; doi:10.1152/jn.01293.2007
- 963 34. Gerhard F, Kispersky T, Gutierrez GJ, Marder E, Kramer M, Eden U. Successful  
964 Reconstruction of a Physiological Circuit with Known Connectivity from Spiking Activity Alone.  
965 *PLoS Comput Biol.* 2013;9. doi:10.1371/journal.pcbi.1003138
- 966 35. Stevenson IH, London BM, Oby ER, Sachs NA, Reimer J, Englitz B, et al. Functional  
967 Connectivity and Tuning Curves in Populations of Simultaneously Recorded Neurons. *PLoS*  
968 *Comput Biol.* Public Library of Science; 2012;8: e1002775. doi:10.1371/journal.pcbi.1002775
- 969 36. Markram H, Wang Y, Tsodyks M. Differential signaling via the same axon of neocortical  
970 pyramidal neurons. *Proc Natl Acad Sci U S A.* 1998;95: 5323–8. doi:10.1073/pnas.95.9.5323
- 971 37. Huang C, Resnik A, Celikel T, Englitz B. Adaptive Spike Threshold Enables Robust and  
972 Temporally Precise Neuronal Encoding. *PLoS Comput Biol.* 2016;  
973 doi:10.1371/journal.pcbi.1004984
- 974 38. Costa RP, Sjöström PJ, van Rossum MCW. Probabilistic inference of short-term synaptic  
975 plasticity in neocortical microcircuits. *Front Comput Neurosci.* 2013;7: 75.  
976 doi:10.3389/fncom.2013.00075
- 977 39. Gil Z, Connors BW, Amitai Y. Differential regulation of neocortical synapses by  
978 neuromodulators and activity. *Neuron.* 1997; doi:10.1016/S0896-6273(00)80380-3

- 979 40. Wang Y, Manis PB. Synaptic Transmission at the Cochlear Nucleus Endbulb Synapse  
980 During Age-Related Hearing Loss in Mice. *J Neurophysiol.* 2005; doi:10.1152/jn.00374.2005
- 981 41. Wang Y, Manis PB. Short-term synaptic depression and recovery at the mature mammalian  
982 endbulb of Held synapse in mice. *J Neurophysiol.* 2008; doi:10.1152/jn.90715.2008
- 983 42. Paz JT, Chavez M, SAILLET S, Deniau J-M, Charpier S. Activity of Ventral Medial Thalamic  
984 Neurons during Absence Seizures and Modulation of Cortical Paroxysms by the Nigrothalamic  
985 Pathway. *J Neurosci.* 2007; doi:10.1523/JNEUROSCI.4677-06.2007
- 986 43. Moore AK, Wehr M. Parvalbumin-Expressing Inhibitory Interneurons in Auditory Cortex  
987 Are Well-Tuned for Frequency. *J Neurosci.* 2013;33: 13713–13723.  
988 doi:10.1523/JNEUROSCI.0663-13.2013
- 989 44. Perrenoud Q, Rossier J, Geoffroy H, Vitalis T, Gallopin T. Diversity of gabaergic  
990 interneurons in layer VIa and VIb of mouse barrel cortex. *Cereb Cortex.* 2013;  
991 doi:10.1093/cercor/bhs032
- 992 45. Harris K, Csicsvari J, Hirase H, Dragoi G, Buzsáki G. Organization of cell assemblies in  
993 the hippocampus. *Nature.* 2003;424: 552–556. doi:10.1038/nature01765.1.
- 994 46. Moore GP, Segundo JP, Perkel DH, Levitan H. Statistical Signs of Synaptic Interaction in  
995 Neurons. *Biophys J.* 1970;10: 876–900. doi:10.1016/S0006-3495(70)86341-X
- 996 47. London M, Schreibman A, Häusser M, Larkum ME, Segev I. The information efficacy  
997 of a synapse. *Nat Neurosci.* 2002;5: 332–340. doi:10.1038/nn826
- 998 48. Pinault D. The juxtacellular recording-labeling technique. *Neuromethods.* 2011.  
999 doi:10.1007/978-1-60327-202-5\_3
- 1000 49. Weiler N, Wood L, Yu J, Solla SA, Shepherd GMG. Top-down laminar organization of  
1001 the excitatory network in motor cortex. *Nat Neurosci.* 2008; doi:10.1038/nn2049
- 1002 50. Ladenbauer J, McKenzie S, English DF, Hagens O, Ostojic S. Inferring and validating  
1003 mechanistic models of neural microcircuits based on spike-train data. *bioRxiv Prepr.* 2018;  
1004 doi:10.1101/261016
- 1005 51. McFarland JM, Cui Y, Butts DA. Inferring Nonlinear Neuronal Computation Based on  
1006 Physiologically Plausible Inputs. *PLoS Comput Biol.* 2013;9. doi:10.1371/journal.pcbi.1003143
- 1007 52. Robinson BS, Berger TW, Song D. Identification of stable spike-timing-dependent  
1008 plasticity from spiking activity with generalized multilinear modeling. *Neural Comput.* 2016;  
1009 doi:10.1162/NECO\_a\_00883
- 1010 53. Song D, Robinson BS, Berger TW. Identification of Short-Term and Long-Term  
1011 Functional Synaptic Plasticity From Spiking Activities. *Adaptive Learning Methods for Nonlinear*  
1012 *System Modeling.* Elsevier; 2018. pp. 289–312. doi:10.1016/B978-0-12-812976-0.00017-8
- 1013 54. Stevenson I, Koerding K. Inferring spike-timing-dependent plasticity from spike train data.  
1014 *Adv Neural Inf Process Syst.* 2011; 1–9. Available:  
1015 [http://machinelearning.wustl.edu/mlpapers/paper\\_files/NIPS2011\\_1399.pdf](http://machinelearning.wustl.edu/mlpapers/paper_files/NIPS2011_1399.pdf)
- 1016 55. Linderman S, Stock C, Adams R. A framework for studying synaptic plasticity with neural  
1017 spike train data. *Adv Neural Inf.* 2014; Available: <http://arxiv.org/abs/1411.4077>

- 1018 56. Amidi Y, Nazari B, Sadri S, ... UE-2018 40th A, 2018 U. Parameter Estimation in Synaptic  
1019 Coupling Model Using a Point Process Modeling Framework\*. *ieeexplore.ieee.org*. 2018;  
1020 doi:10.1109/EMBC.2018.8512815
- 1021 57. Bayat Mokhtari E, Lawrence JJ, Stone EF. Data Driven Models of Short-Term Synaptic  
1022 Plasticity. *Front Comput Neurosci*. 2018; doi:10.3389/fncom.2018.00032
- 1023 58. Markram H, Muller E, Ramaswamy S, Reimann MW, Abdellah M, Sanchez CA, et al.  
1024 Reconstruction and Simulation of Neocortical Microcircuitry. *Cell*. 2015;163: 456–492.  
1025 doi:10.1016/j.cell.2015.09.029
- 1026 59. Karmarkar UR, Buonomano D V. Timing in the Absence of Clocks: Encoding Time in  
1027 Neural Network States. *Neuron*. 2007; doi:10.1016/j.neuron.2007.01.006
- 1028 60. Klyachko VA, Stevens CF. Excitatory and feed-forward inhibitory hippocampal synapses  
1029 work synergistically as an adaptive filter of natural spike trains. *PLoS Biol*. 2006;4: 1187–1200.  
1030 doi:10.1371/journal.pbio.0040207
- 1031 61. Swadlow HA, Gusev AG. Receptive-field construction in cortical inhibitory interneurons.  
1032 *Nature Neuroscience*. 2002. doi:10.1038/nn847
- 1033 62. Kawaguchi Y. Distinct firing patterns of neuronal subtypes in cortical synchronized  
1034 activities. *J Neurosci*. 2001; doi:21/18/7261 [pii]
- 1035 63. Swadlow HA. Thalamocortical control of feed-forward inhibition in awake somatosensory  
1036 “barrel” cortex. *Philos Trans R Soc Lond B Biol Sci*. 2002;357: 1717–27.  
1037 doi:10.1098/rstb.2002.1156
- 1038 64. Keine C, RübSamen R, Englitz B. Signal integration at spherical bushy cells enhances  
1039 representation of temporal structure but limits its range. *Elife*. 2017;6. doi:10.7554/eLife.29639
- 1040 65. Keine C, Rubsamen R, Englitz B. Inhibition in the auditory brainstem enhances signal  
1041 representation and regulates gain in complex acoustic environments. *Elife*. 2016;5.  
1042 doi:10.7554/eLife.19295
- 1043 66. Mora Lopez C, Putzeys J, Raducanu BC, Ballini M, Wang S, Andrei A, et al. A Neural  
1044 Probe with Up to 966 Electrodes and Up to 384 Configurable Channels in 0.13  $\mu\text{m}$  SOI CMOS.  
1045 *IEEE Trans Biomed Circuits Syst*. 2017;11: 510–522. doi:10.1109/TBCAS.2016.2646901
- 1046 67. Jun JJ, Steinmetz NA, Siegle JH, Denman DJ, Bauza M, Barbarits B, et al. Fully integrated  
1047 silicon probes for high-density recording of neural activity. *Nature*. 2017;551: 232–236.  
1048 doi:10.1038/nature24636
- 1049 68. Pachitariu M, Steinmetz N, Kadir S, Carandini M, Harris KD. Kilosort: realtime spike-  
1050 sorting for extracellular electrophysiology with hundreds of channels [Internet]. *bioRxiv*. 2016.  
1051 doi:10.1101/061481
- 1052 69. Dale H. Pharmacology and Nerve-endings. *J R Soc Med*. 1935;28: 319–332.  
1053 doi:10.1177/003591573502800330
- 1054 70. Tsodyks M, Pawelzik K, Markram H. Neural networks with dynamic synapses. *Neural*  
1055 *Comput* 1998 May;10(4)821-835. 1998;835: 821–835. doi:10.1162/089976698300017502

1056 71. Tsodyks M V., Markram H. The neural code between neocortical pyramidal neurons  
1057 depends on neurotransmitter release probability. Proc Natl Acad Sci. 1997;94: 719–723.  
1058 doi:10.1073/pnas.94.2.719

1059 72. Hatsopoulos NG, Xu Q, Amit Y. Encoding of Movement Fragments in the Motor Cortex.  
1060 J Neurosci. 2007;27: 5105–5114. doi:10.1523/JNEUROSCI.3570-06.2007

1061

1062



1063 **Figure 6— figure supplement 1:** Spike transmission probabilities patterns and cross-  
1064 correlograms for each of the microcircuits identified from the multi-electrode array recording.  
1065 Excitatory inputs (cross-correlograms at left with corresponding transmission probability (Prob.)  
1066 numbers) to the putative inhibitory neurons are shown along with selected outgoing cross-  
1067 correlograms used to identify putative inhibitory neurons (right). Spike wave-shapes are shown in  
1068 each circle. Top panel shows the disentangled paired-pulse ratios using simulations following  
1069 model fits – membrane integration (yellow); STP (blue); integration and STP (orange). Numbers  
1070 on each line connecting putative excitatory neurons and the inhibitory neuron corresponds to  
1071 depth differences between recording electrodes.

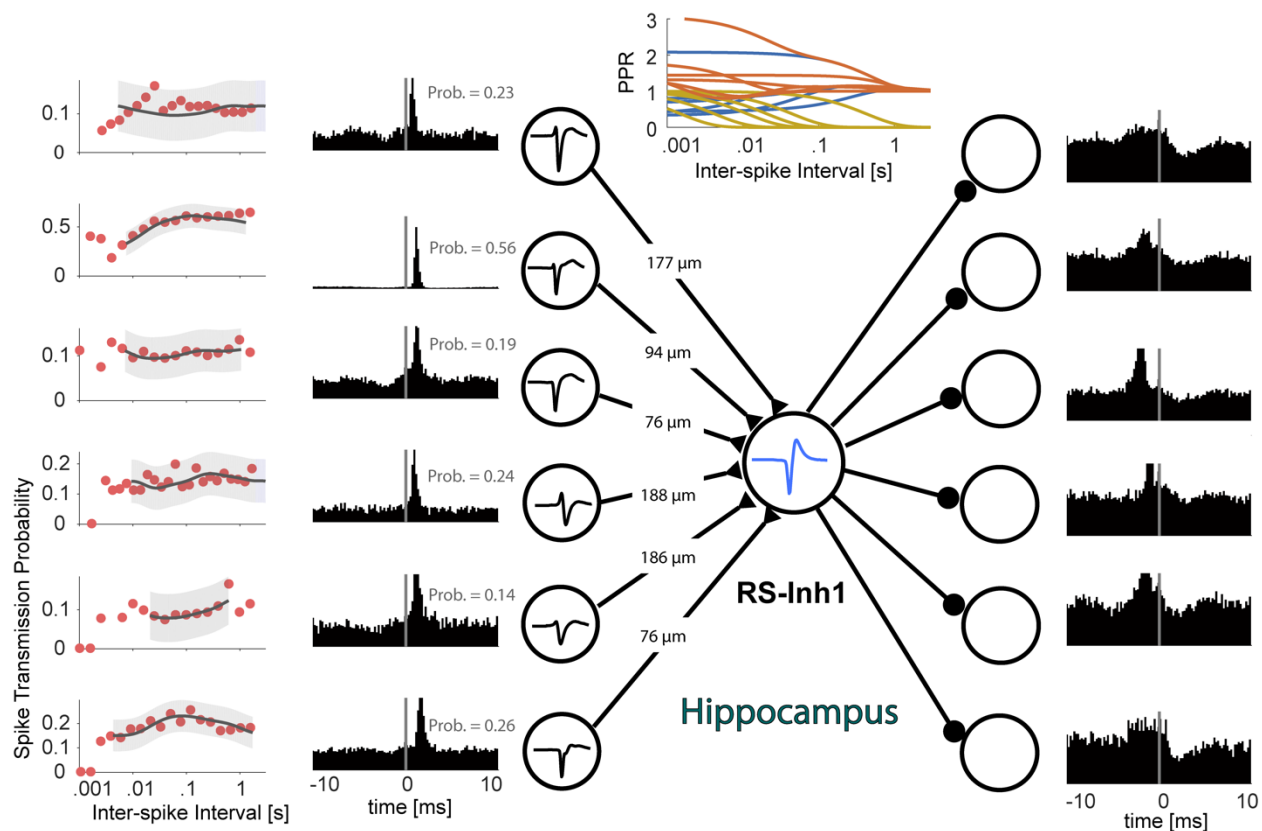

1072

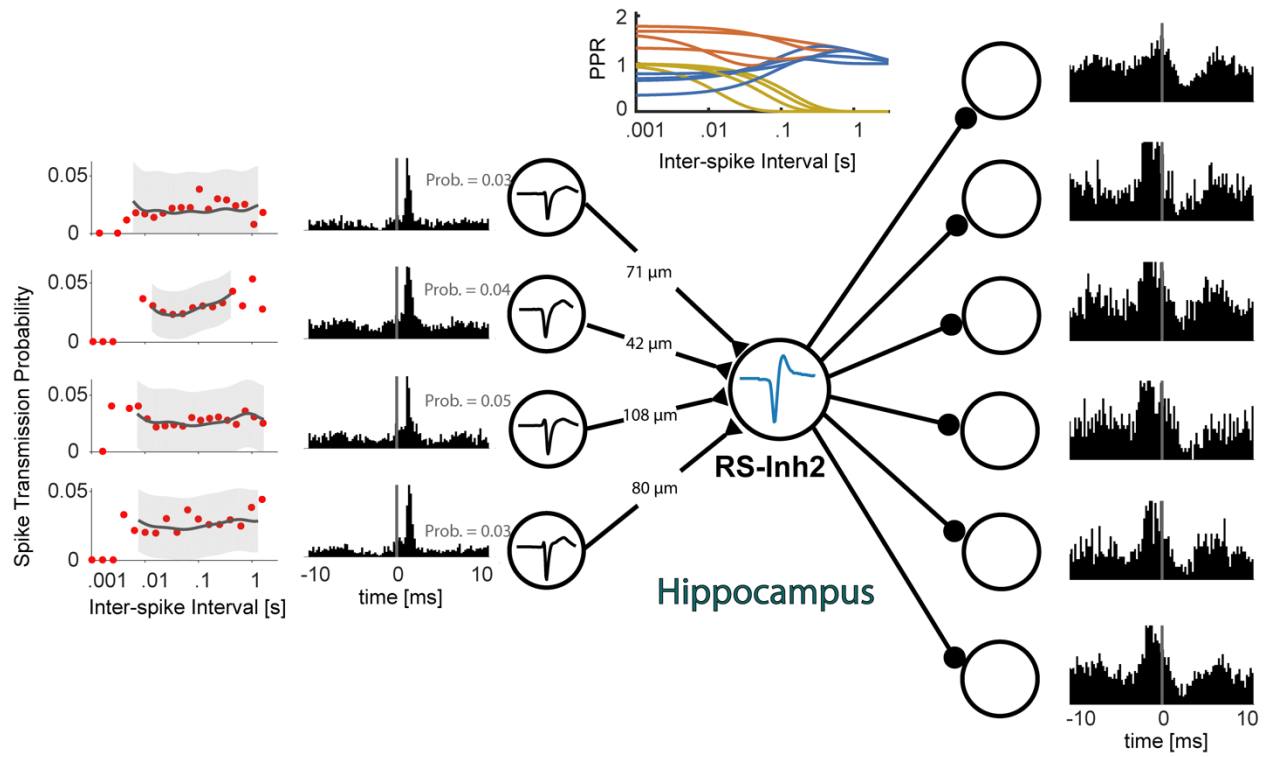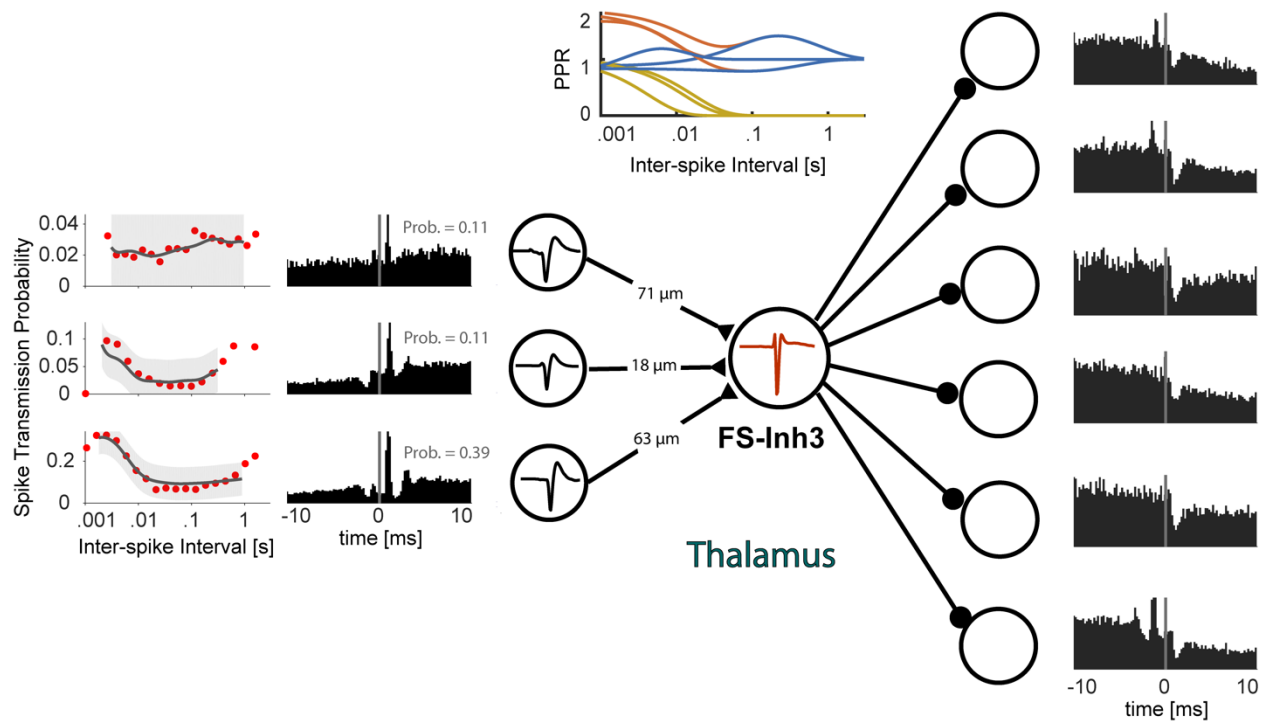

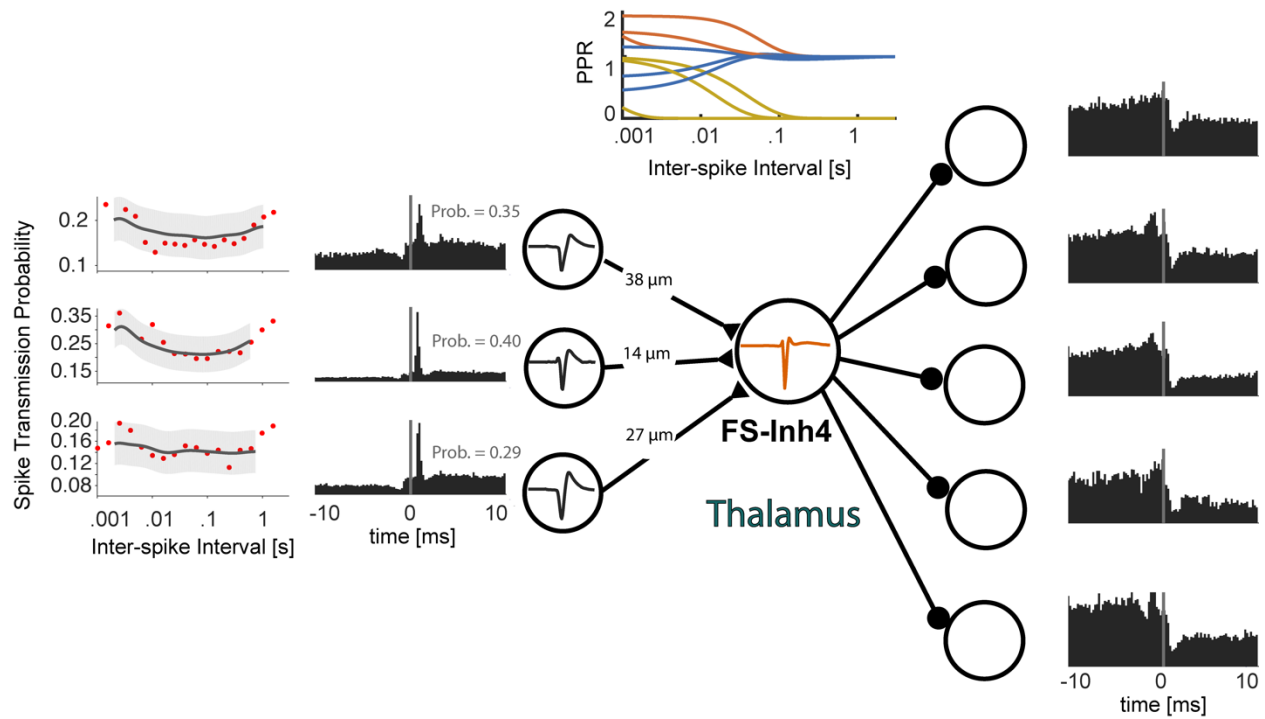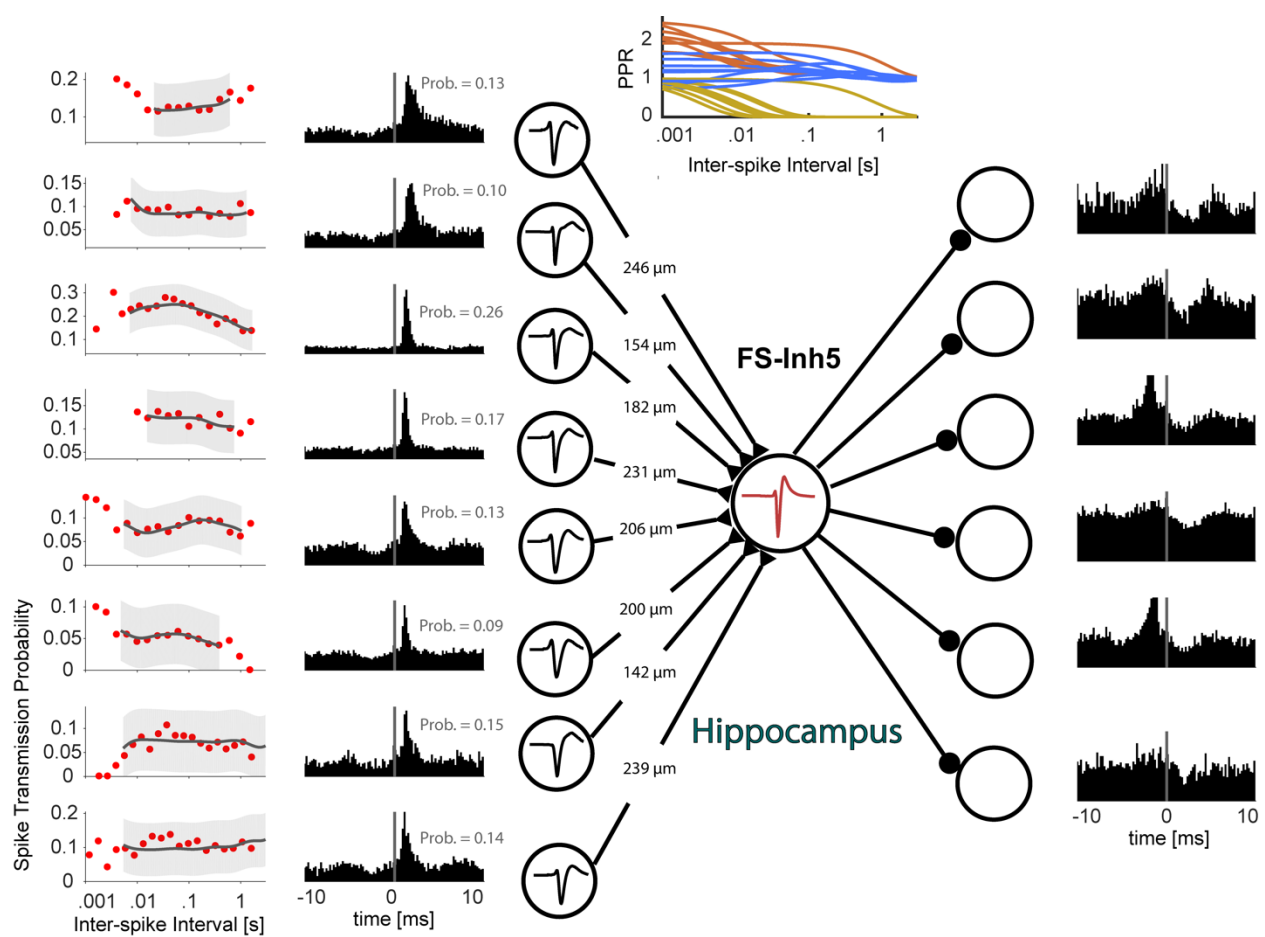

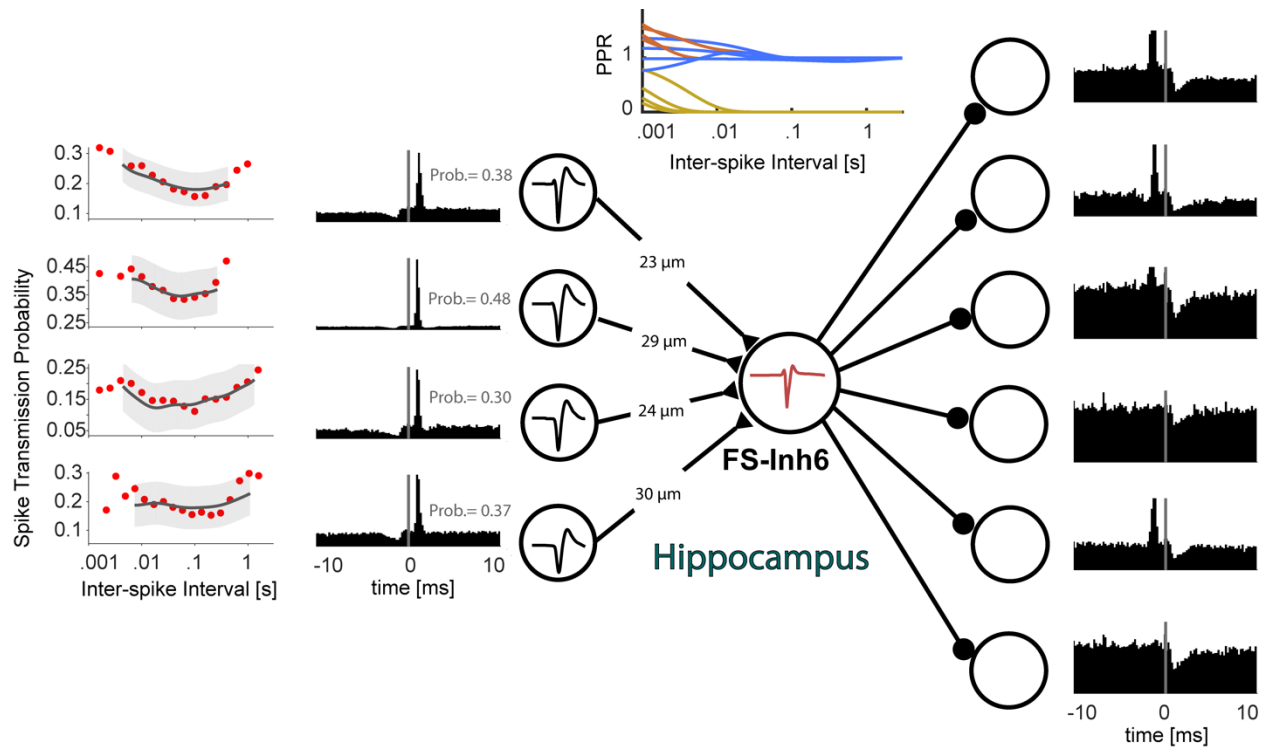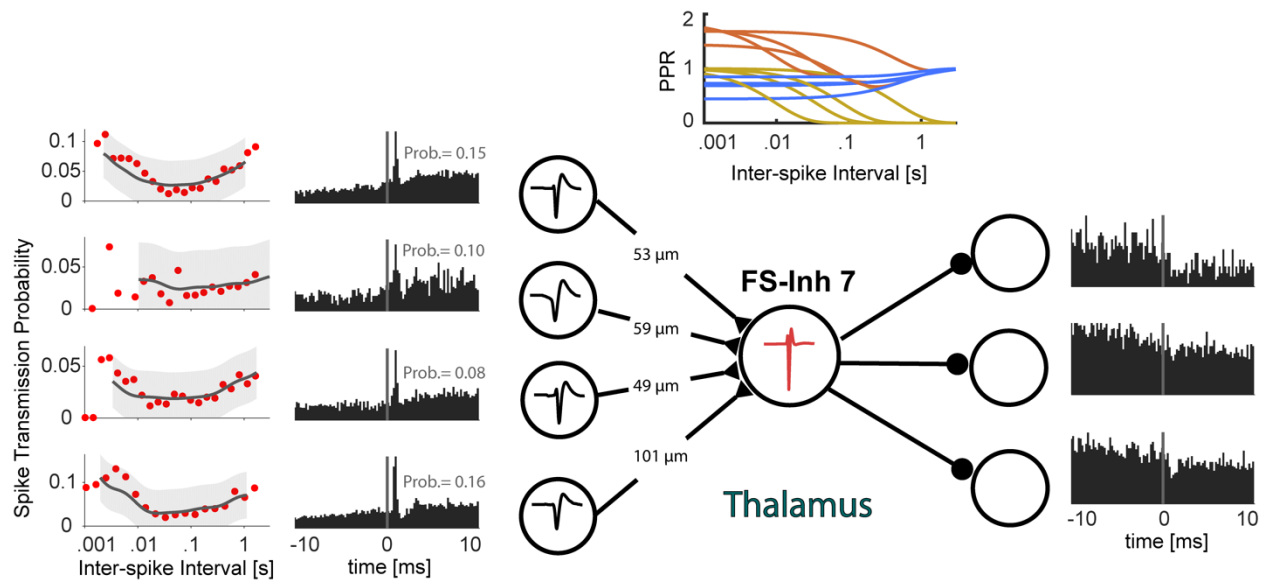

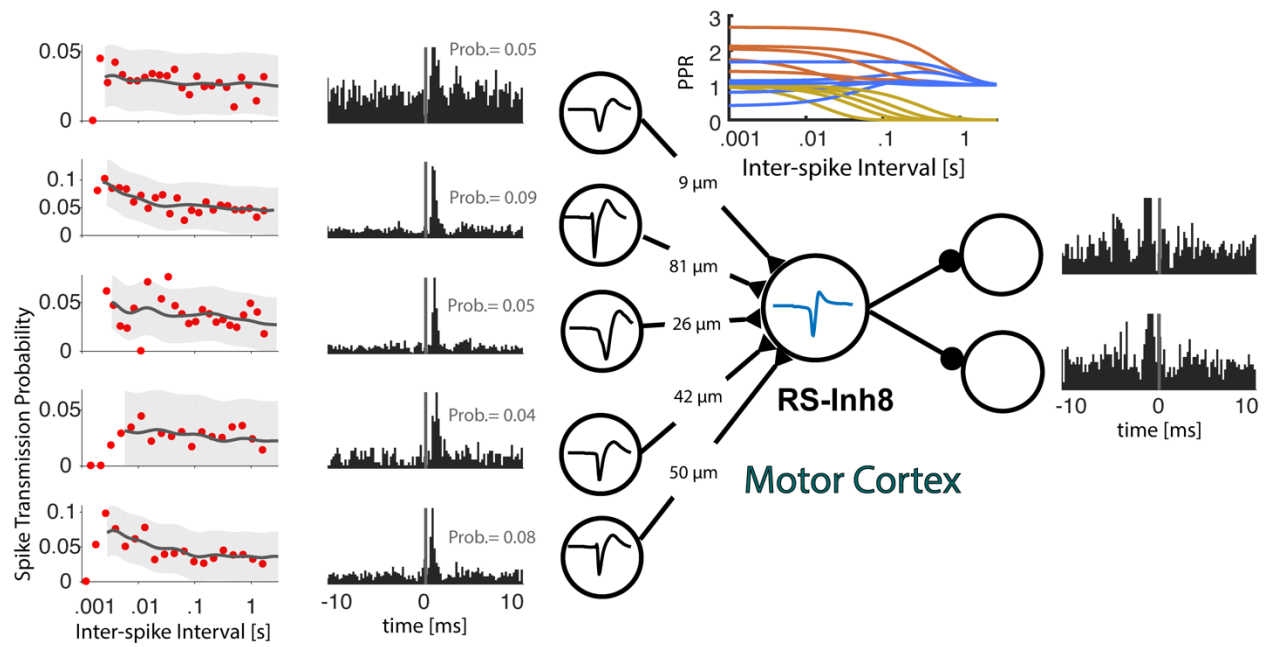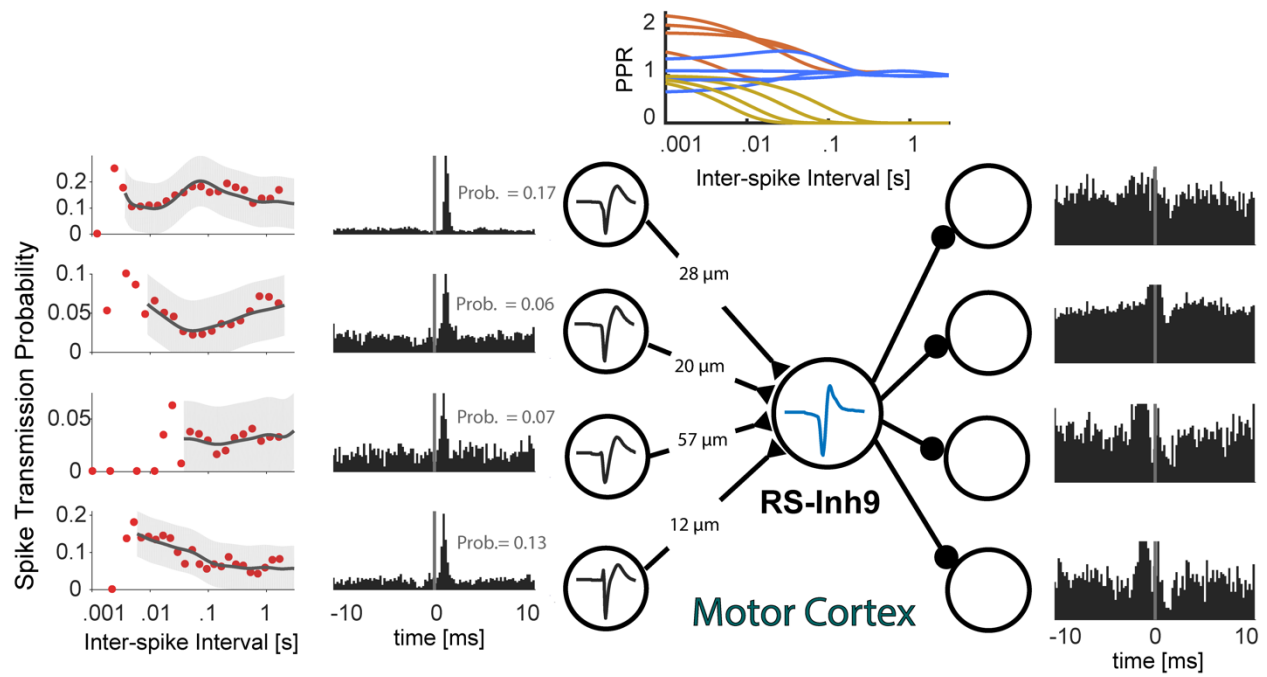

Source: https://www.biorxiv.org/content/10.1101/475178v1.full.pdf
